# Supplementary material for: Synthesis of polysubstituted pyrroles via [3 + 2]-annulation of aziridines and β-nitroalkenes under aerobic conditions
Source: Royal Society of Chemistry journal article supplement (doi:10.1039/c3ob42324g), 2013-12-20

# **Electronic Supplementary Information**

*for*

**Synthesis of Polysubstituted Pyrroles via [3 + 2]-annulations of Aziridines and  $\beta$ -Nitroalkenes**

**Under Aerobic Conditions**

*Shaoyin Wang,<sup>†,‡</sup> Xiancui Zhu,<sup>‡</sup> Zhuo Chai,<sup>\*,‡</sup> Shaowu Wang<sup>\*,‡,§</sup>*

<sup>†</sup> Department of Chemistry, Wannan Medical College, Wuhu, Anhui 241002, P. R. China .

<sup>‡</sup> The Key Laboratory of Functional Molecular Solids, Ministry of Education, Anhui Laboratory of Molecule-Based Materials, Institute of Organic Chemistry, School of Chemistry and Materials Science, Anhui Normal University, Wuhu, Anhui 241000, P. R. China.

<sup>§</sup> State Key Laboratory of Organometallic Chemistry, Shanghai Institute of Organic Chemistry, Chinese Academy of Sciences, Shanghai 200032, P. R. China

E-mail: swwang@mail.ahnu.edu.cn. chaizhuo@mail.ahnu.edu.cn

## **Table of Contents**

|                                                                                       |               |
|---------------------------------------------------------------------------------------|---------------|
| <b>Copies of <math>^1\text{H}</math> NMR and <math>^{13}\text{C}</math> NMR .....</b> | <b>S2-S24</b> |
|---------------------------------------------------------------------------------------|---------------|

# Copies of $^1\text{H}$ NMR and $^{13}\text{C}$ NMR

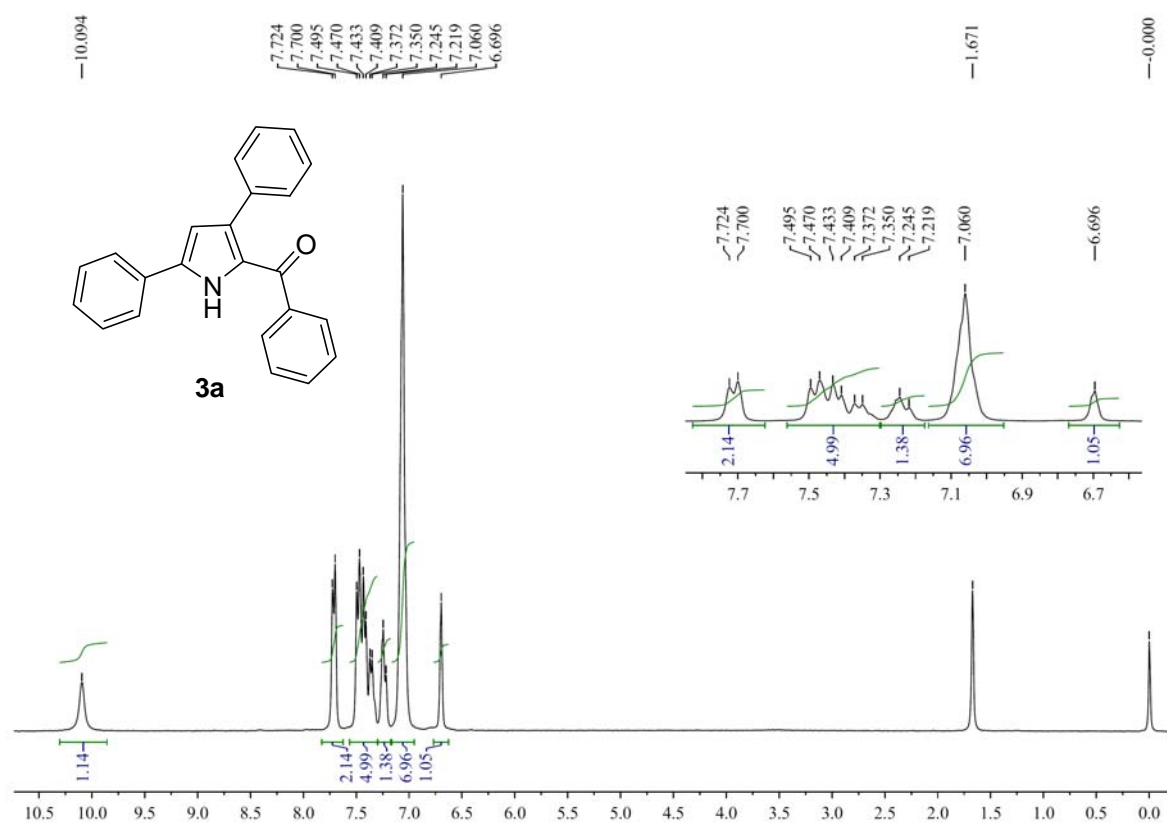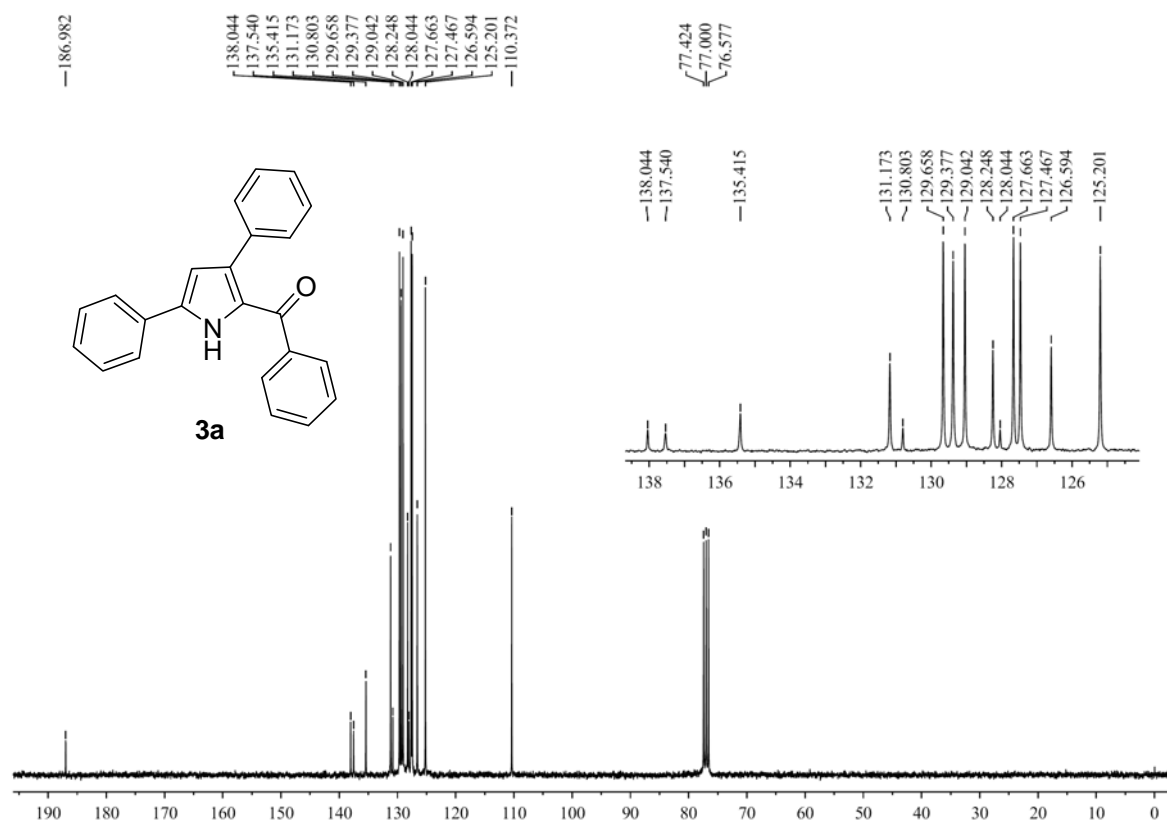

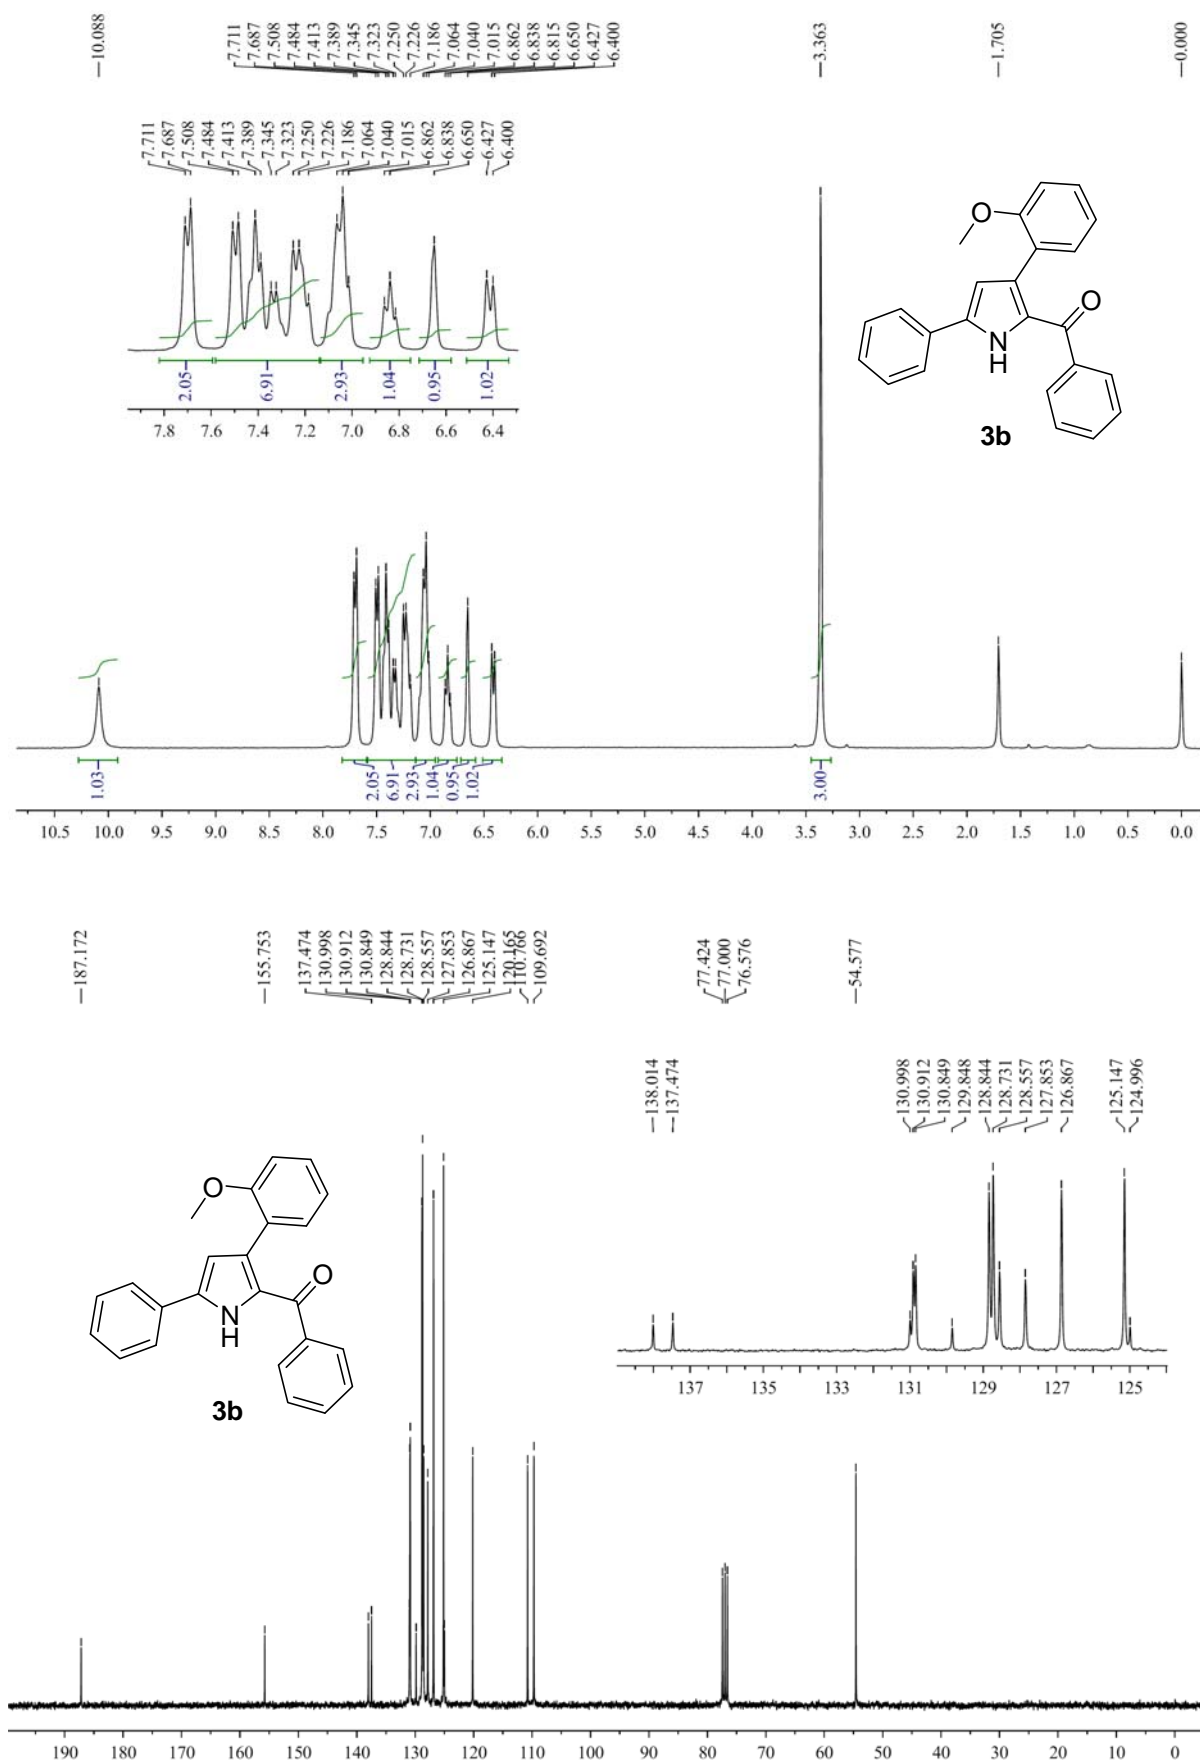

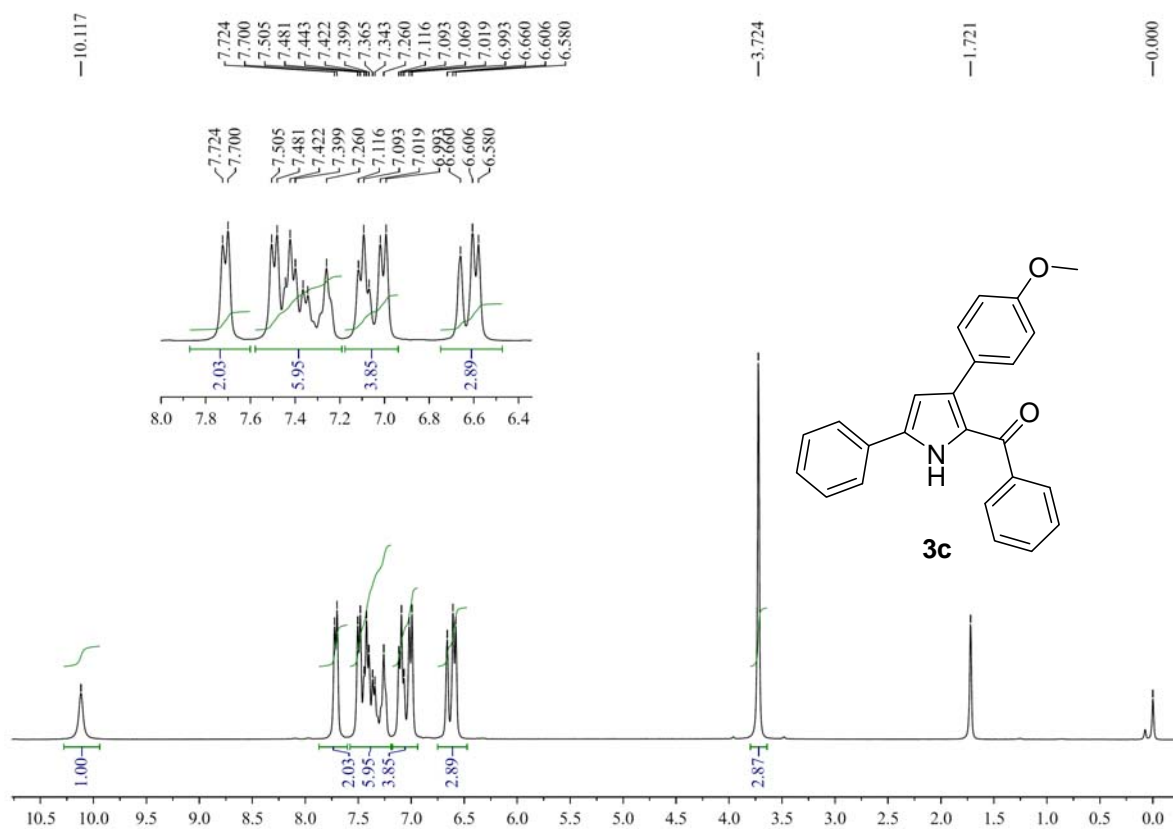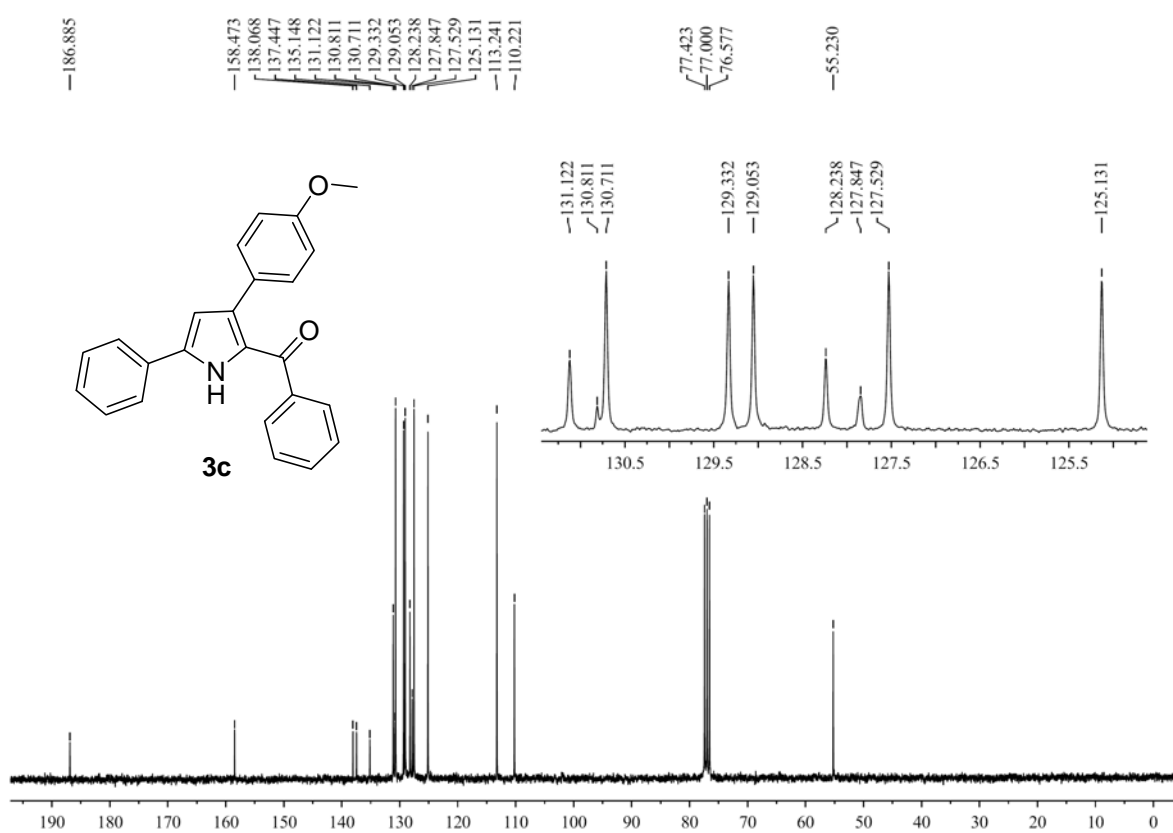

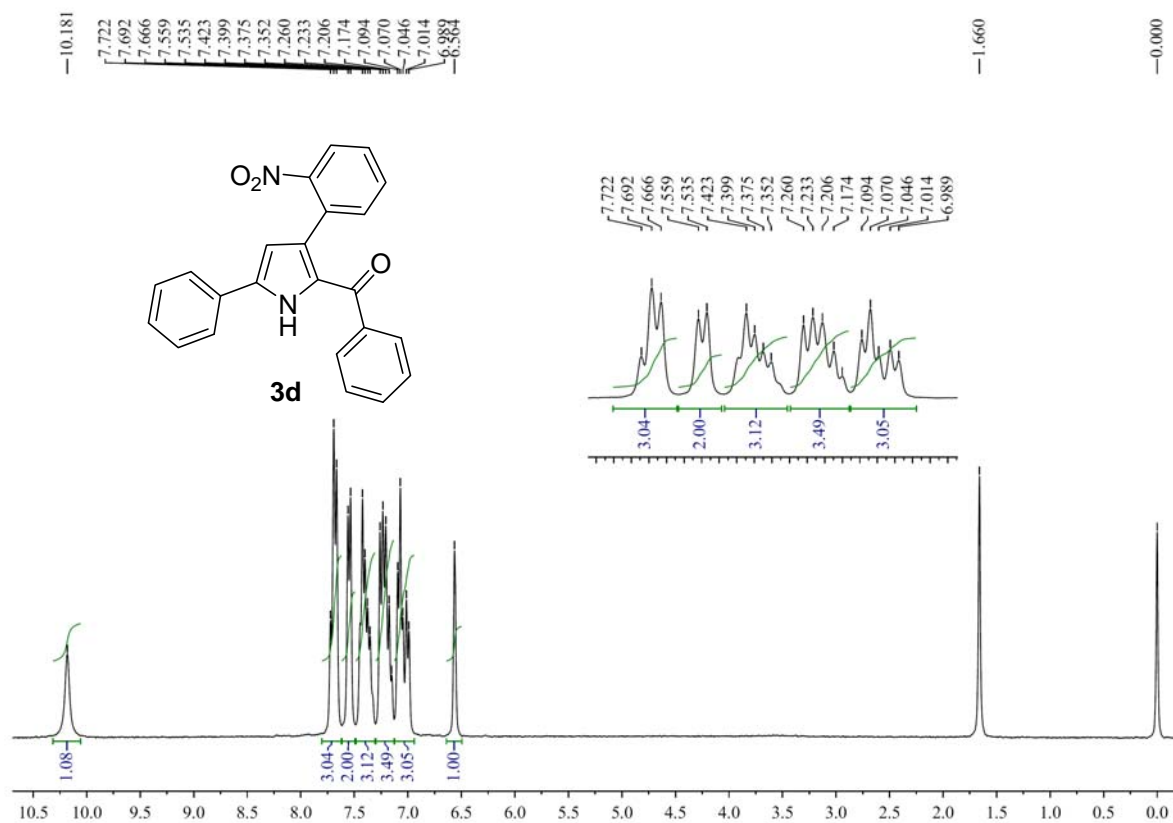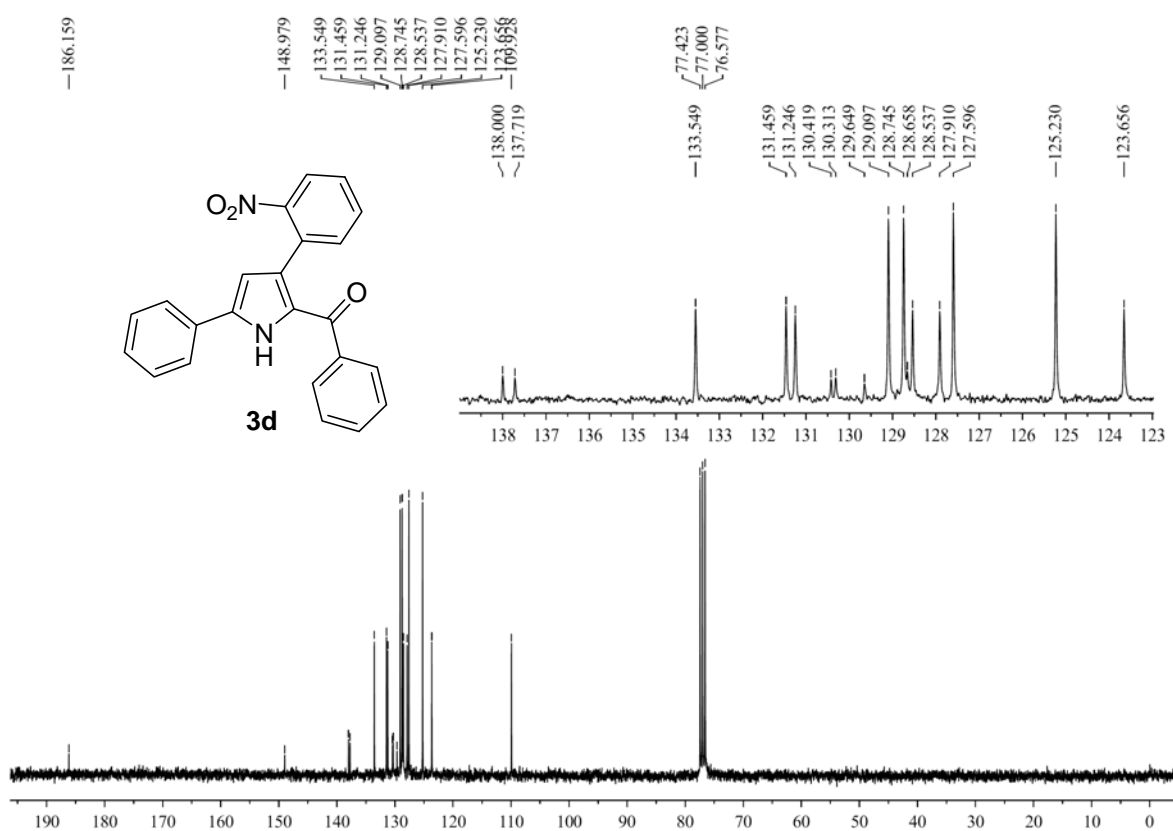

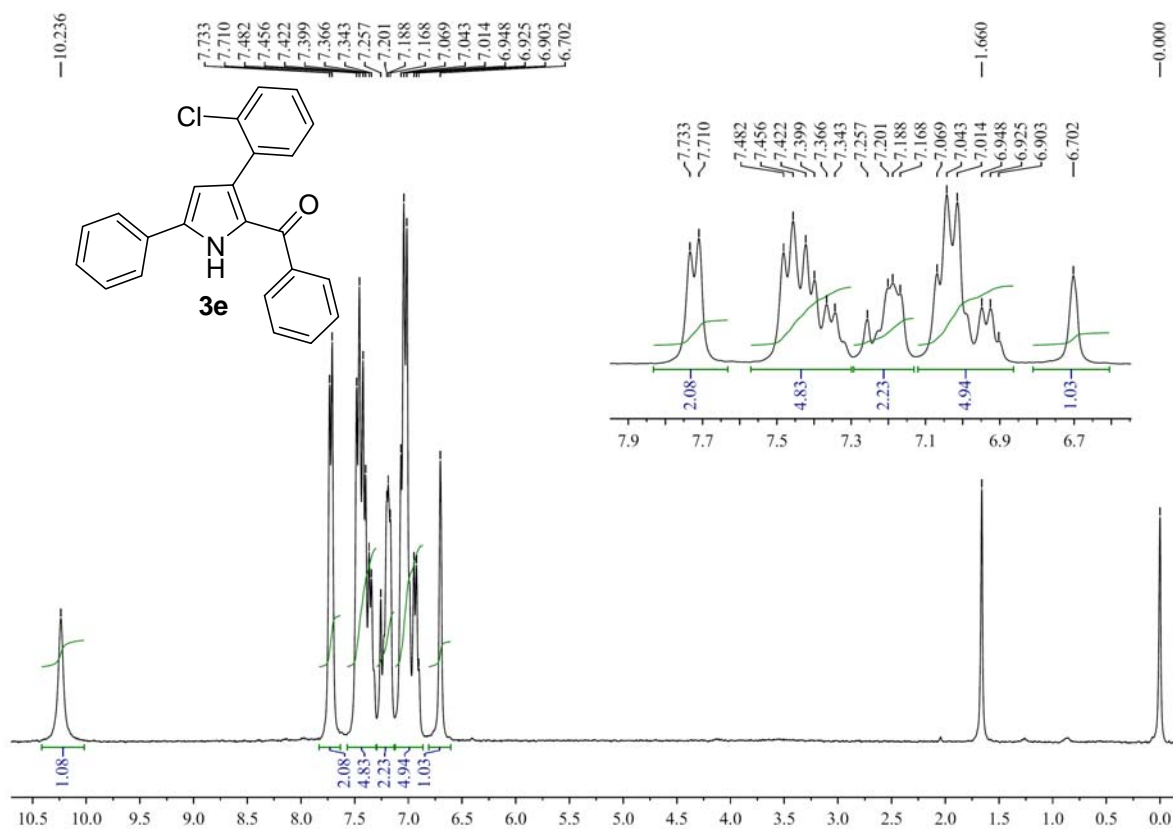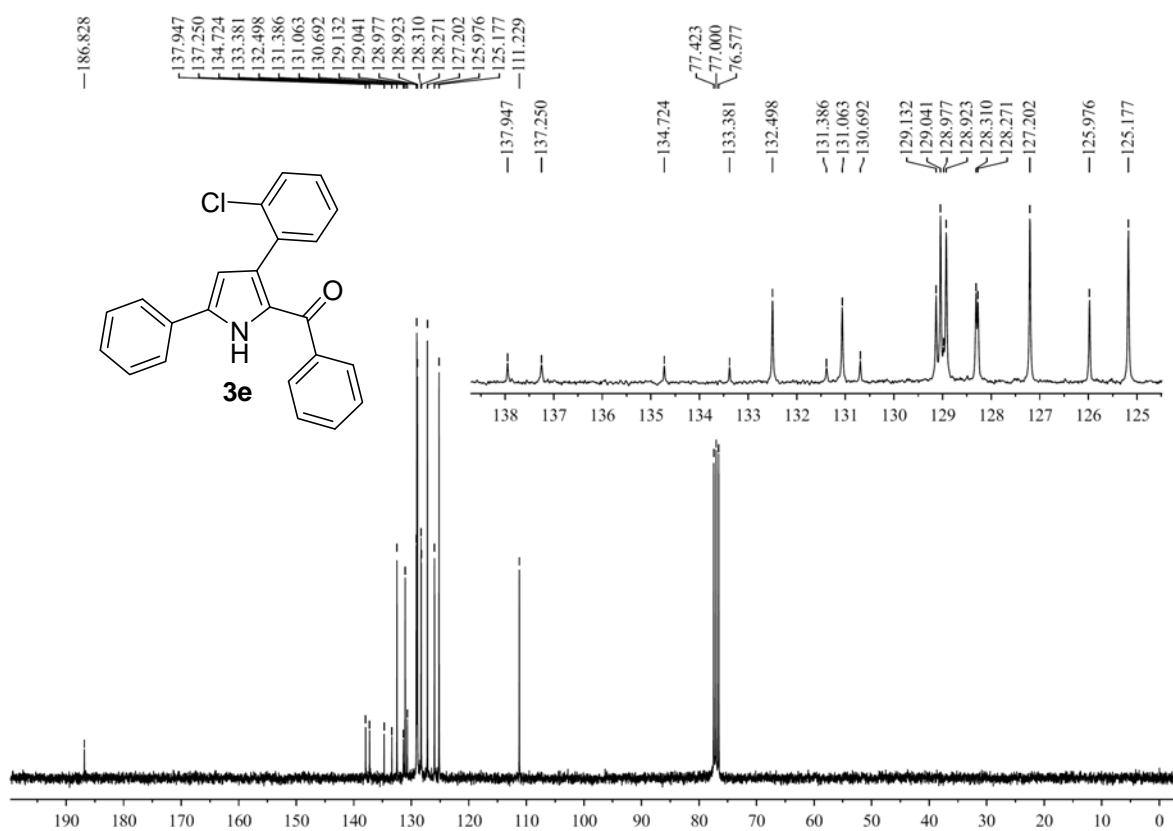

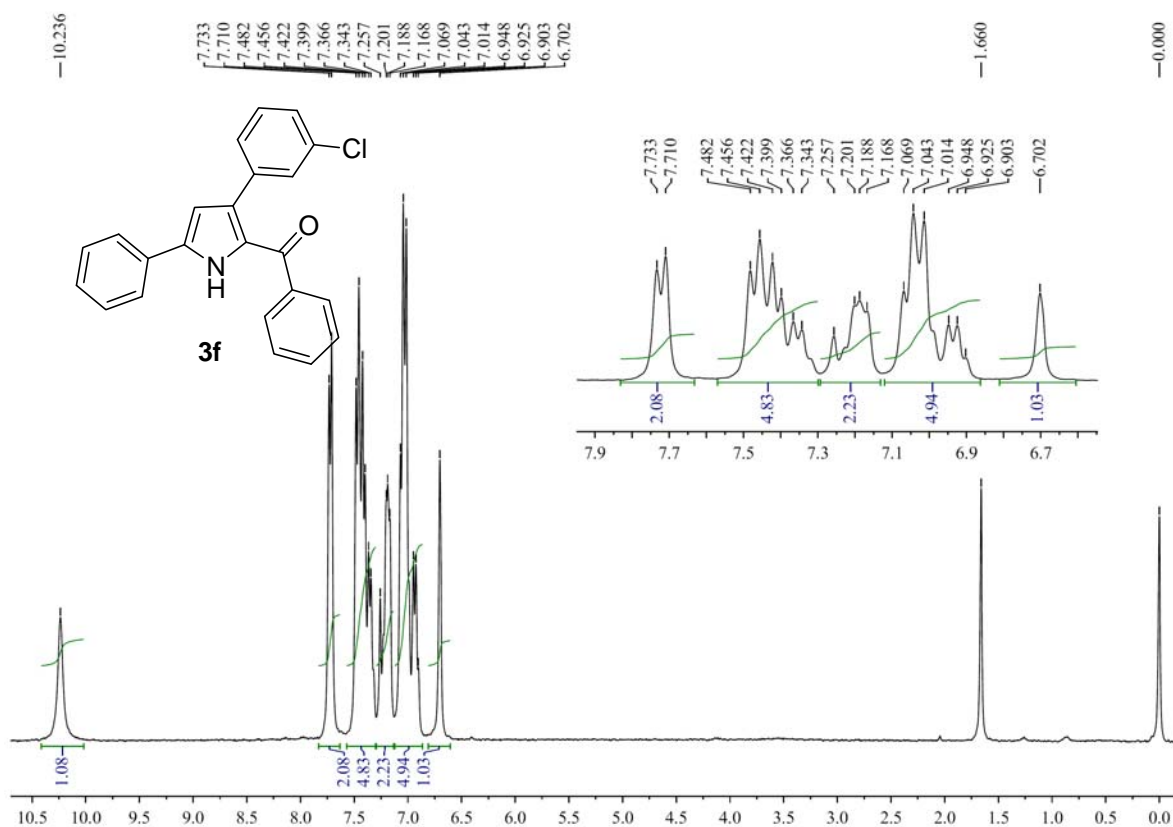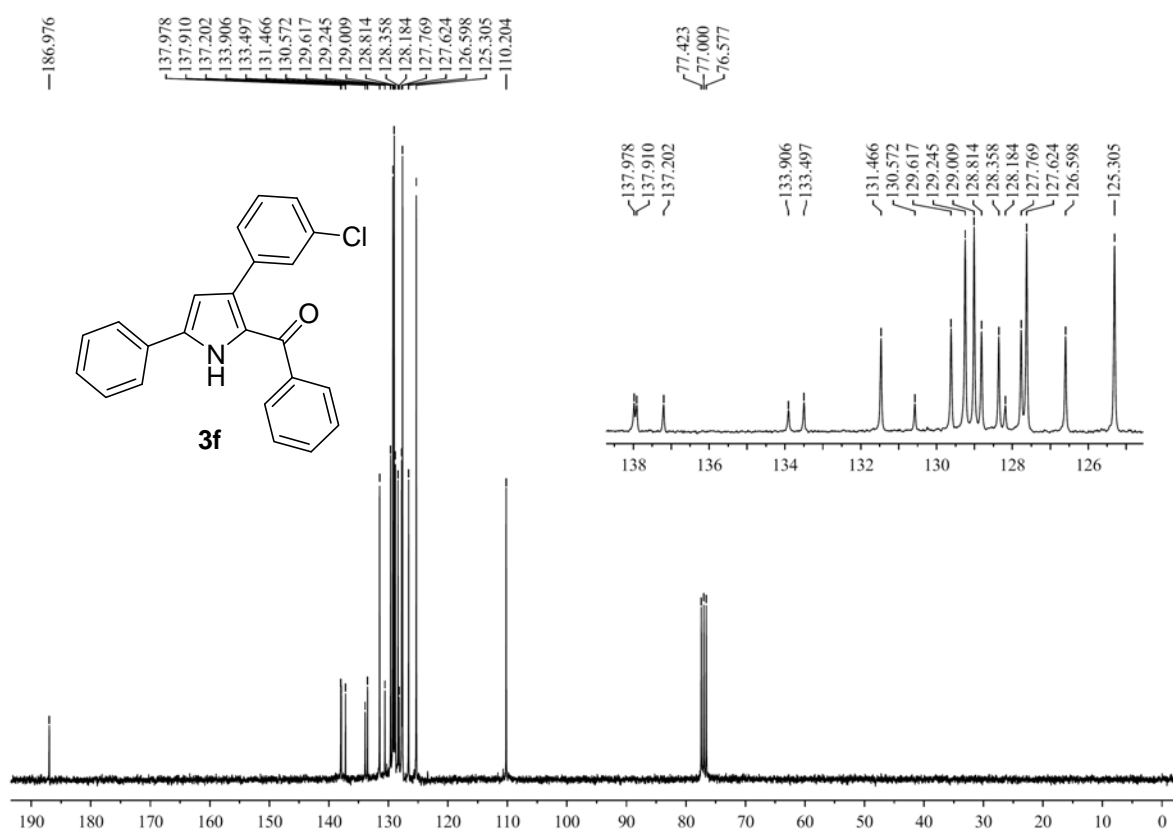

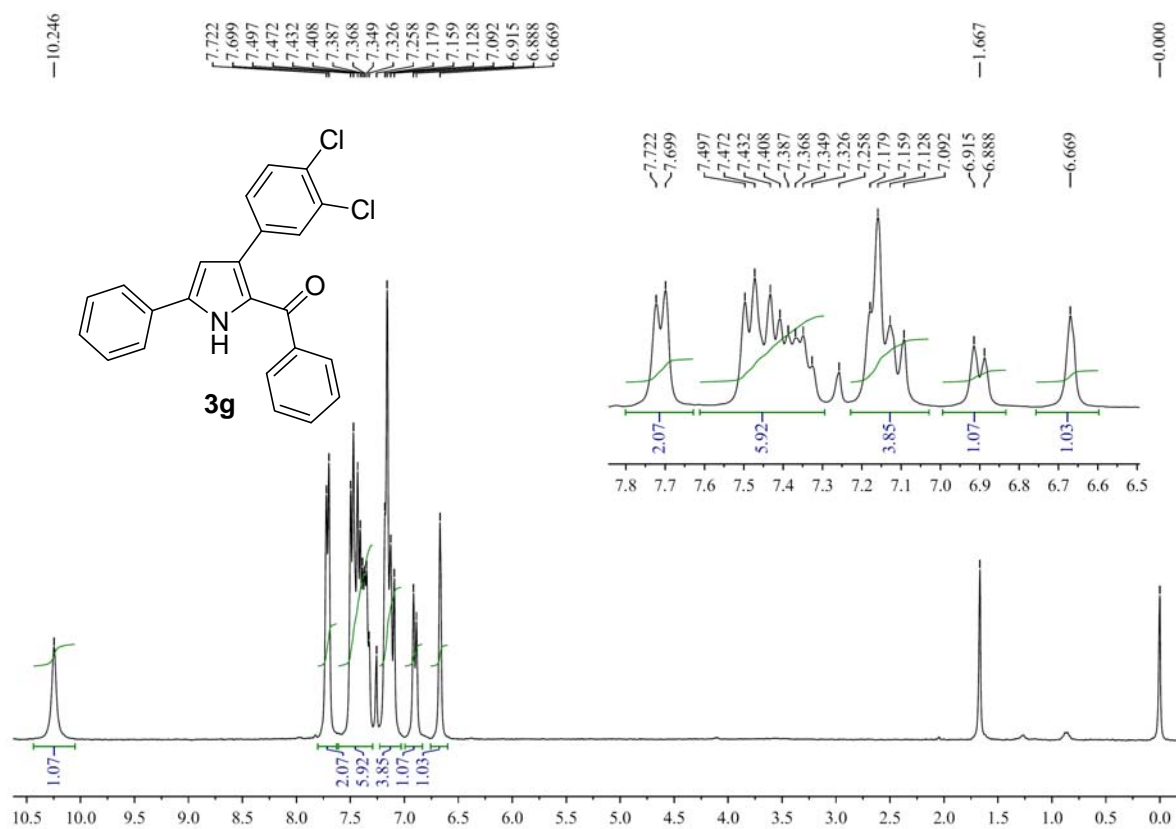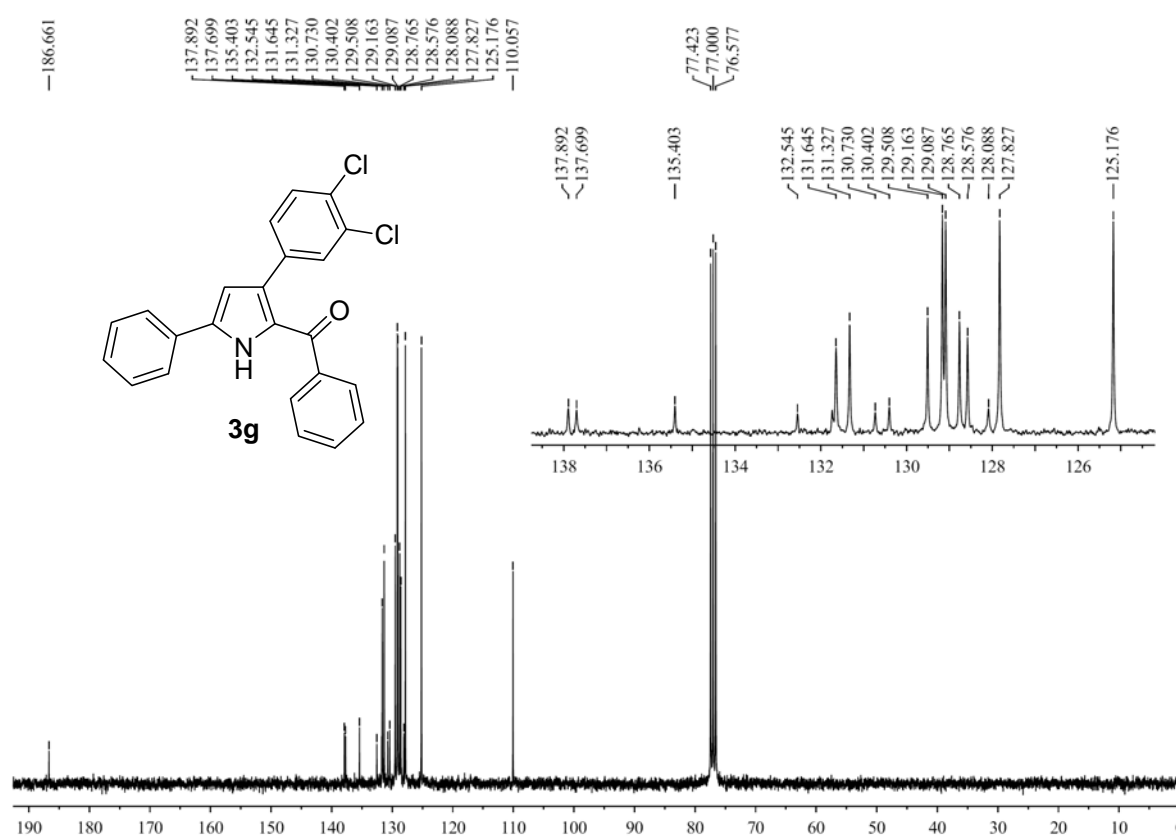



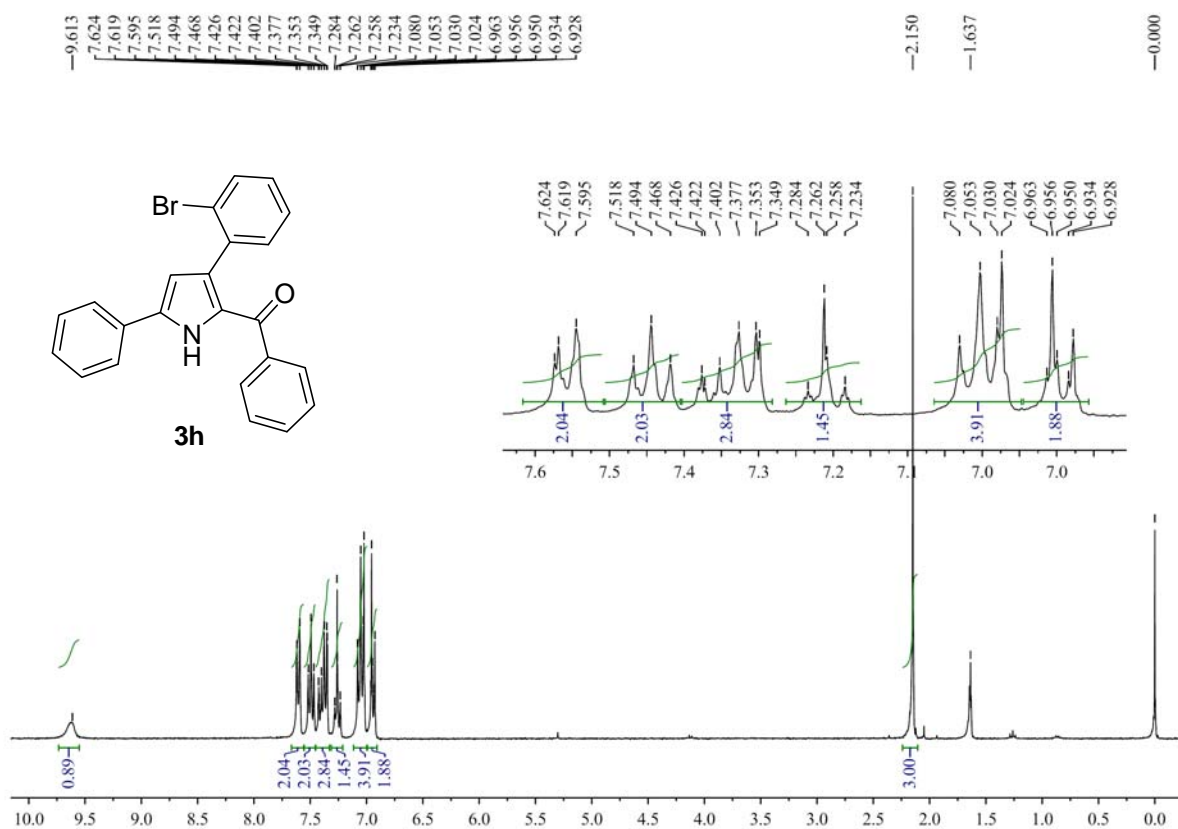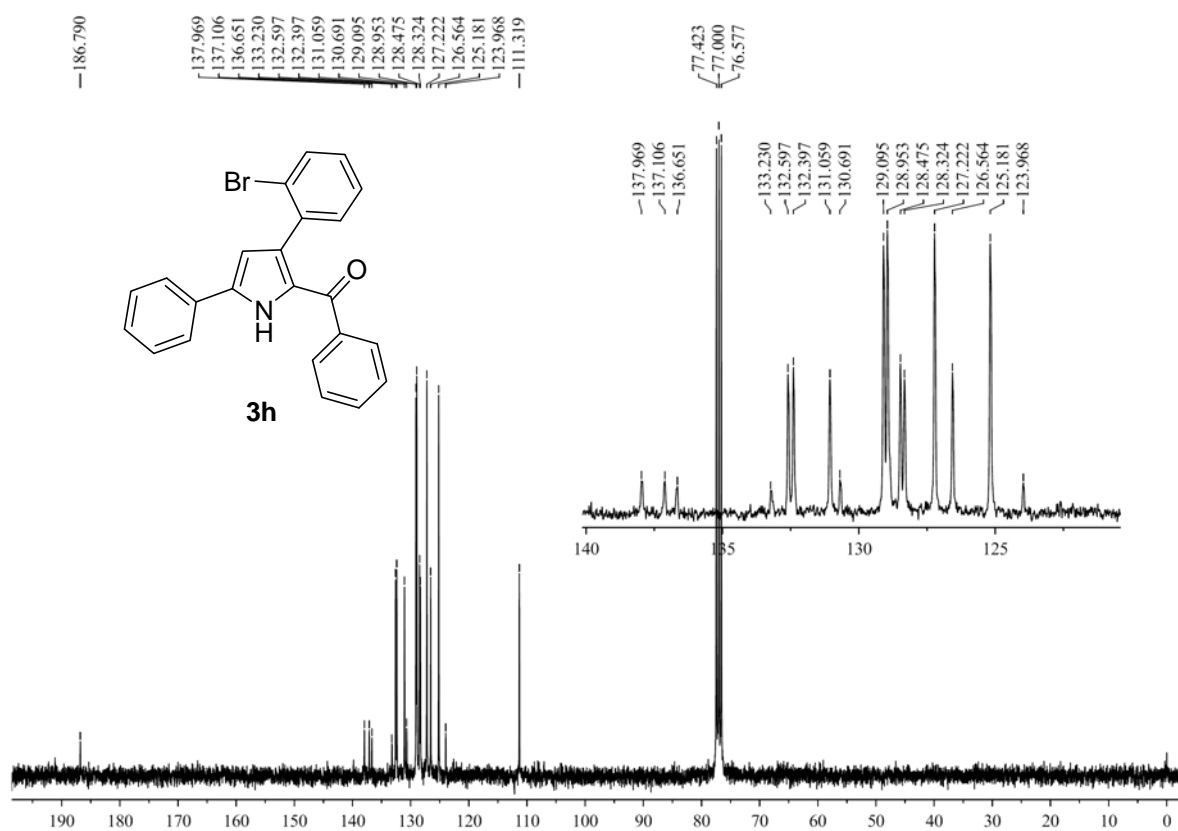

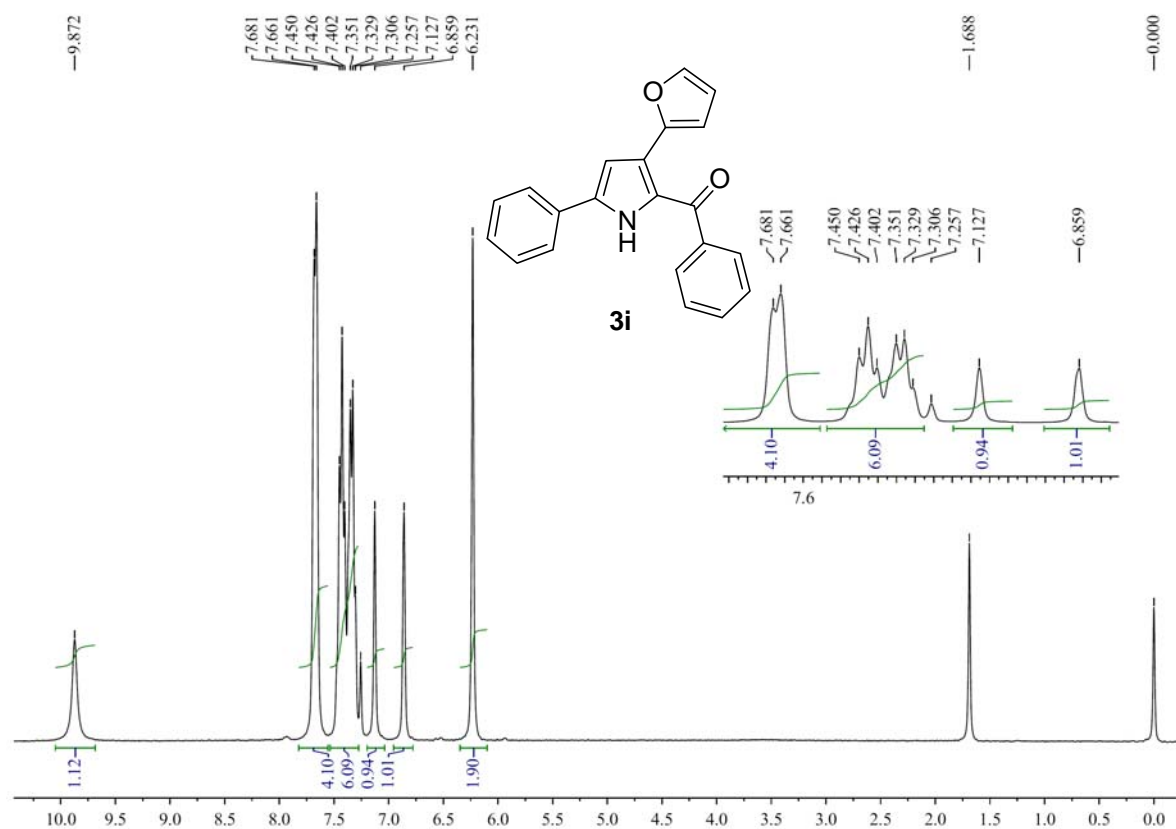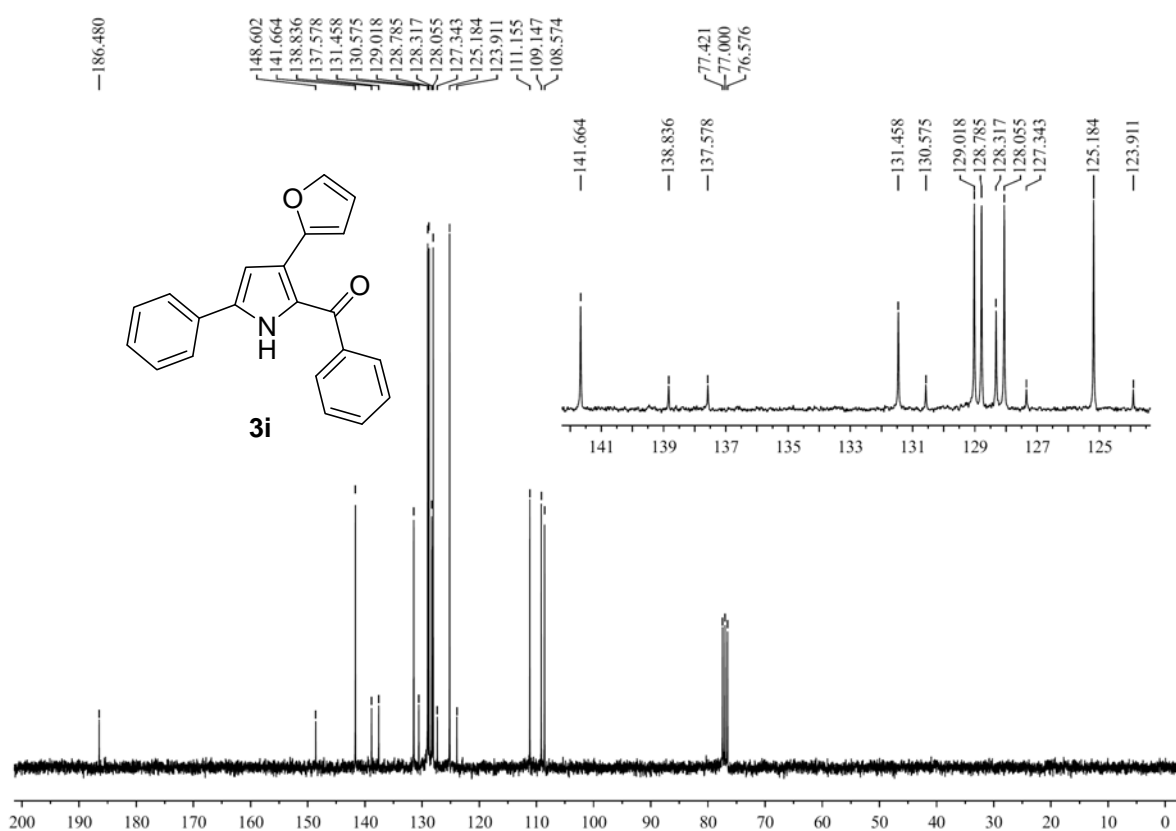

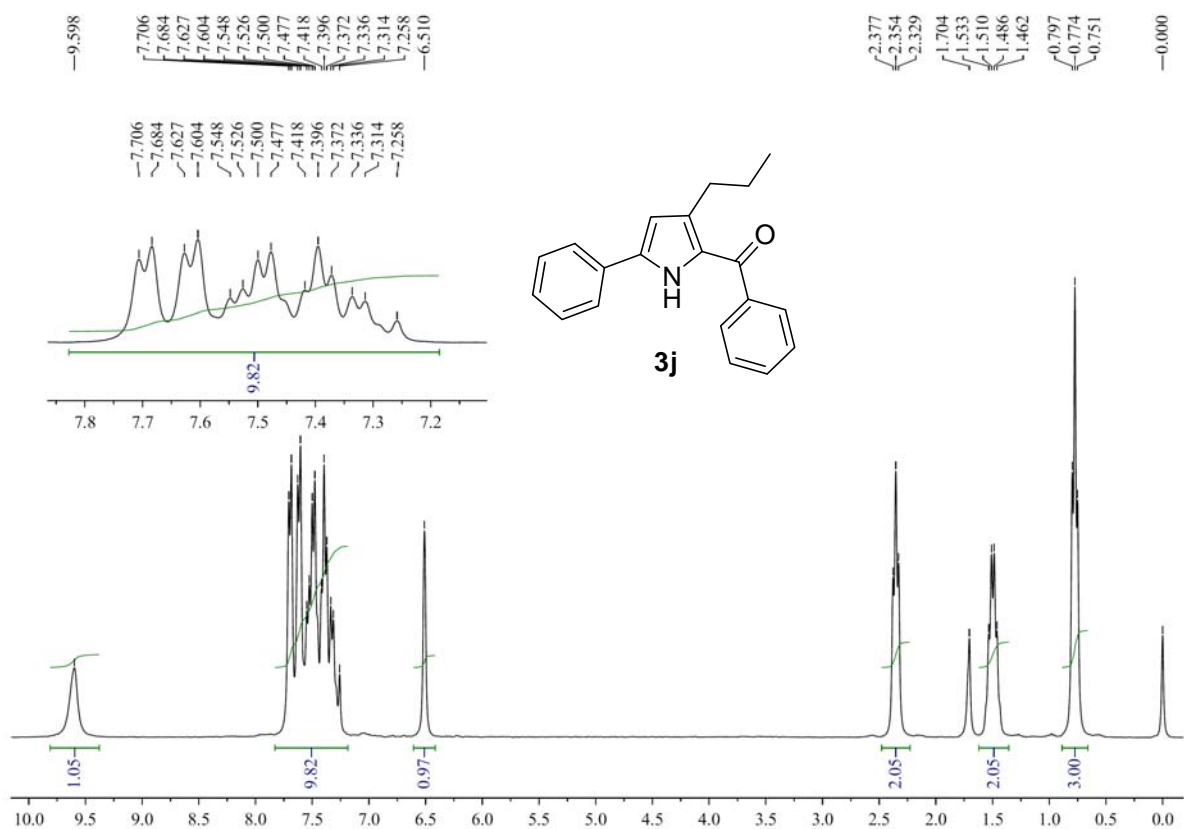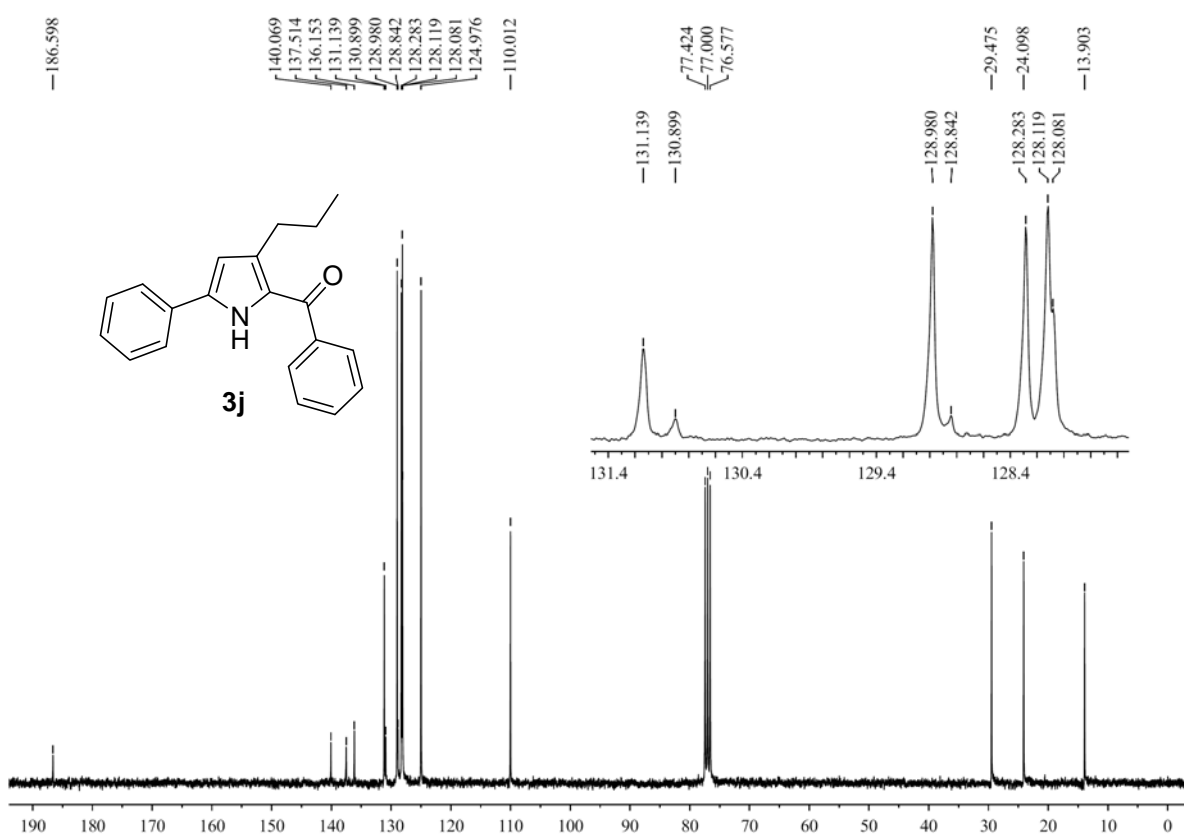

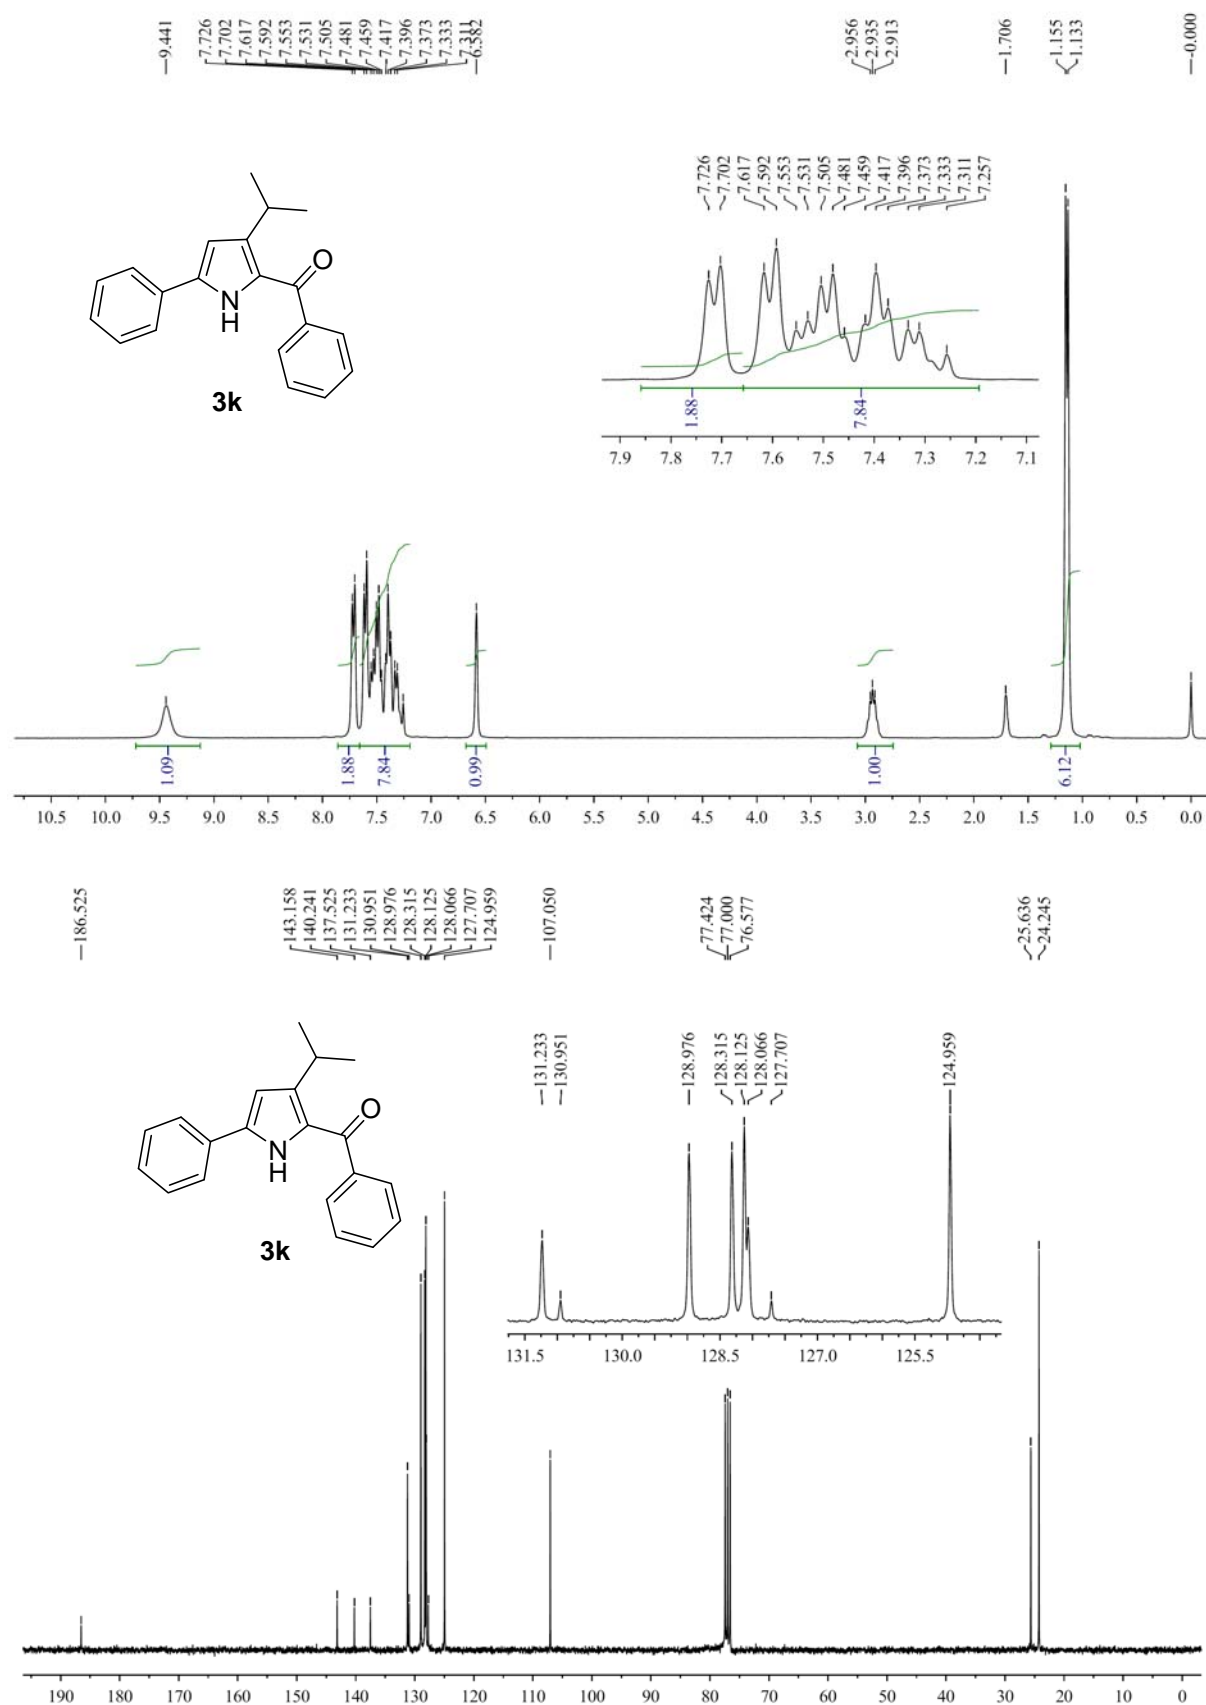

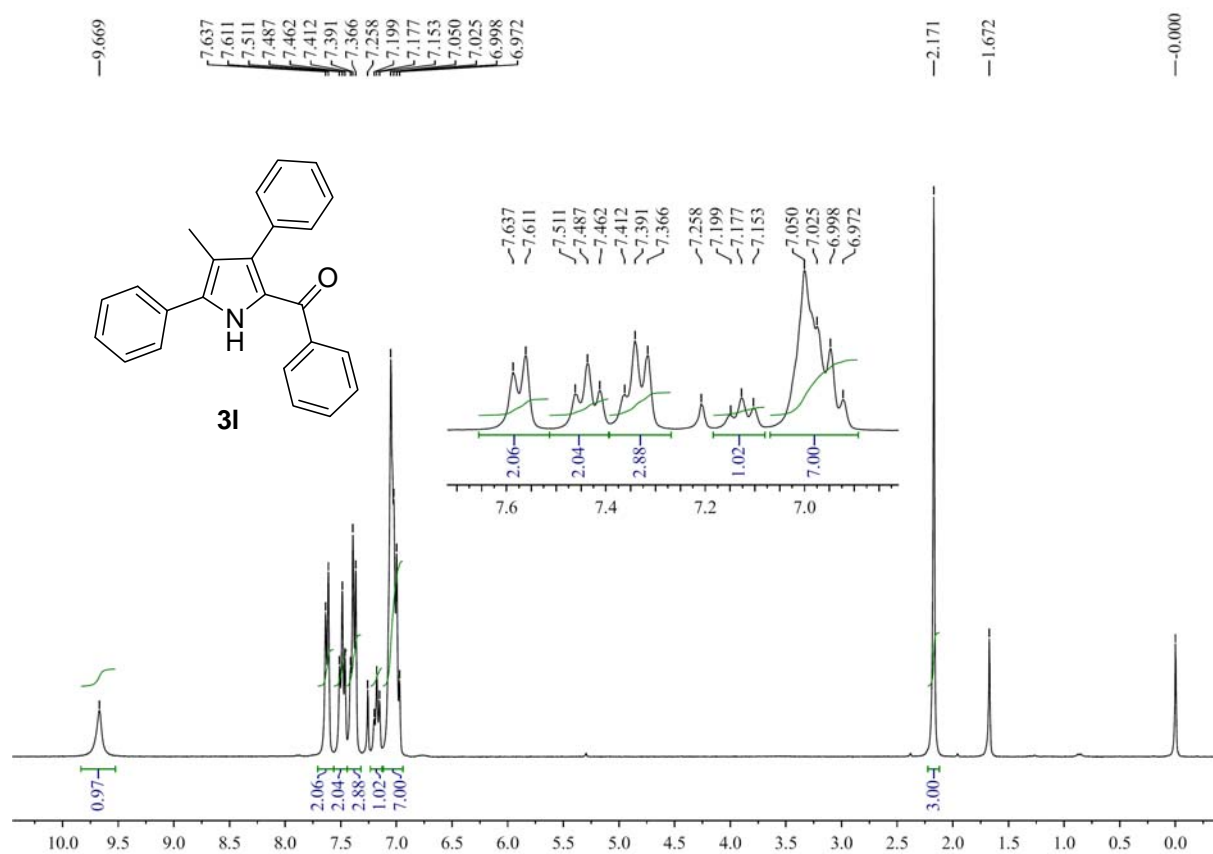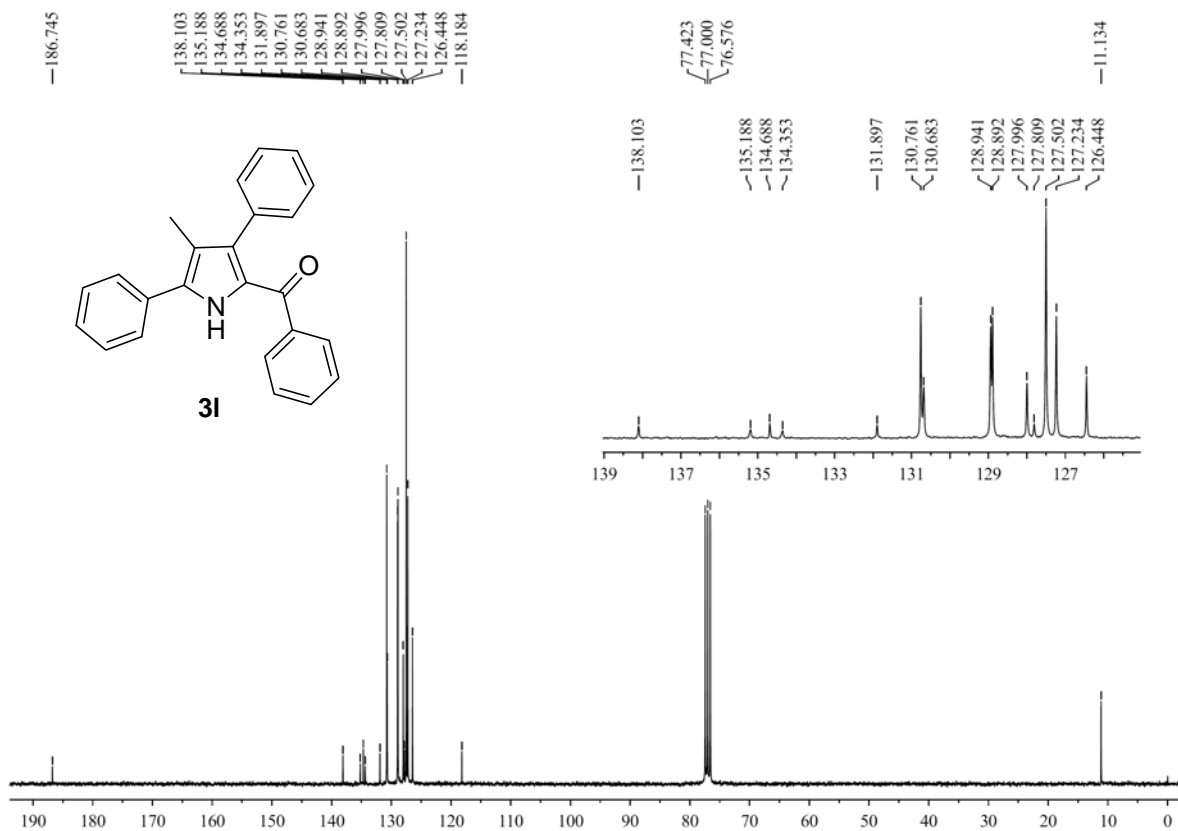

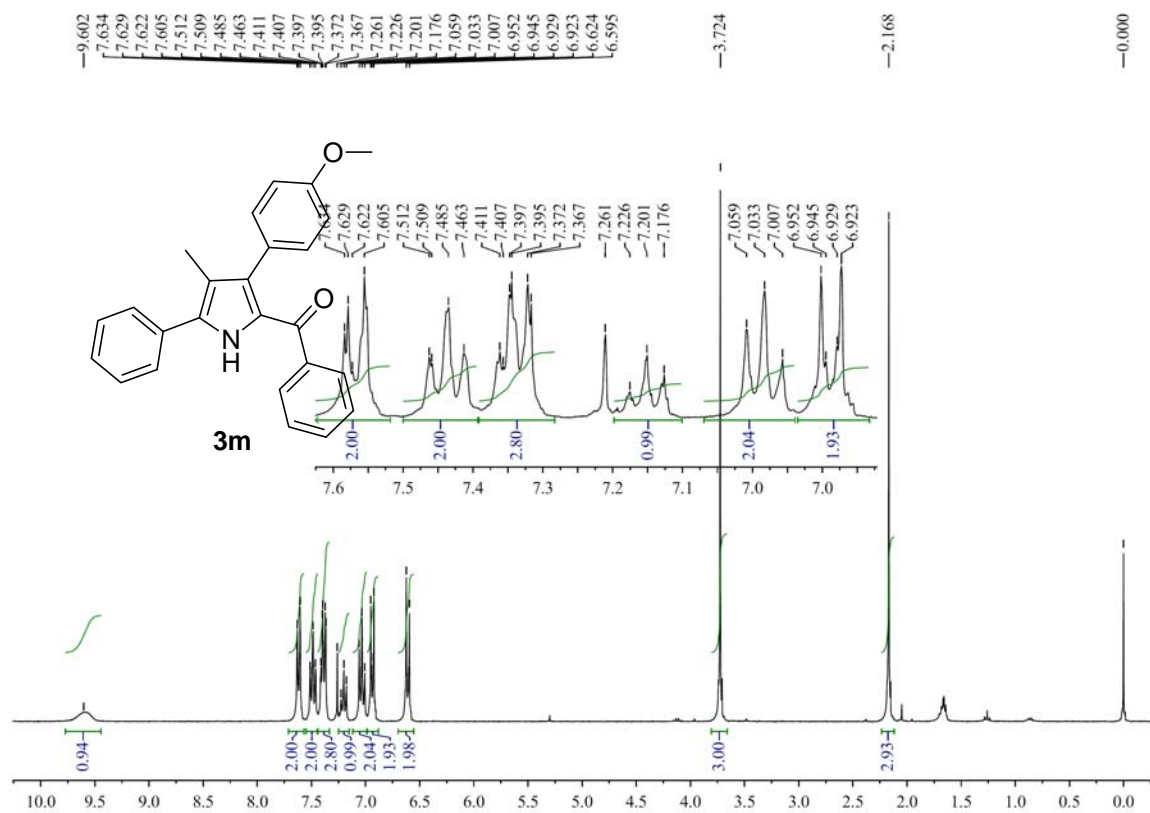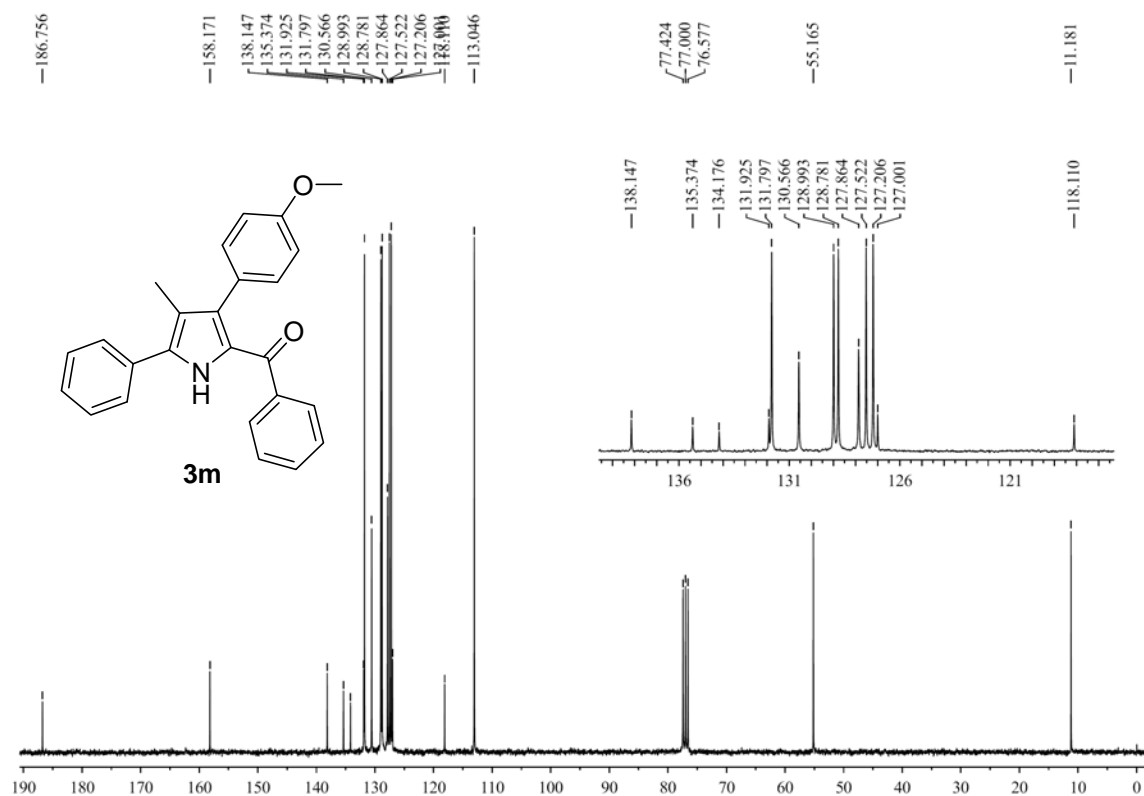

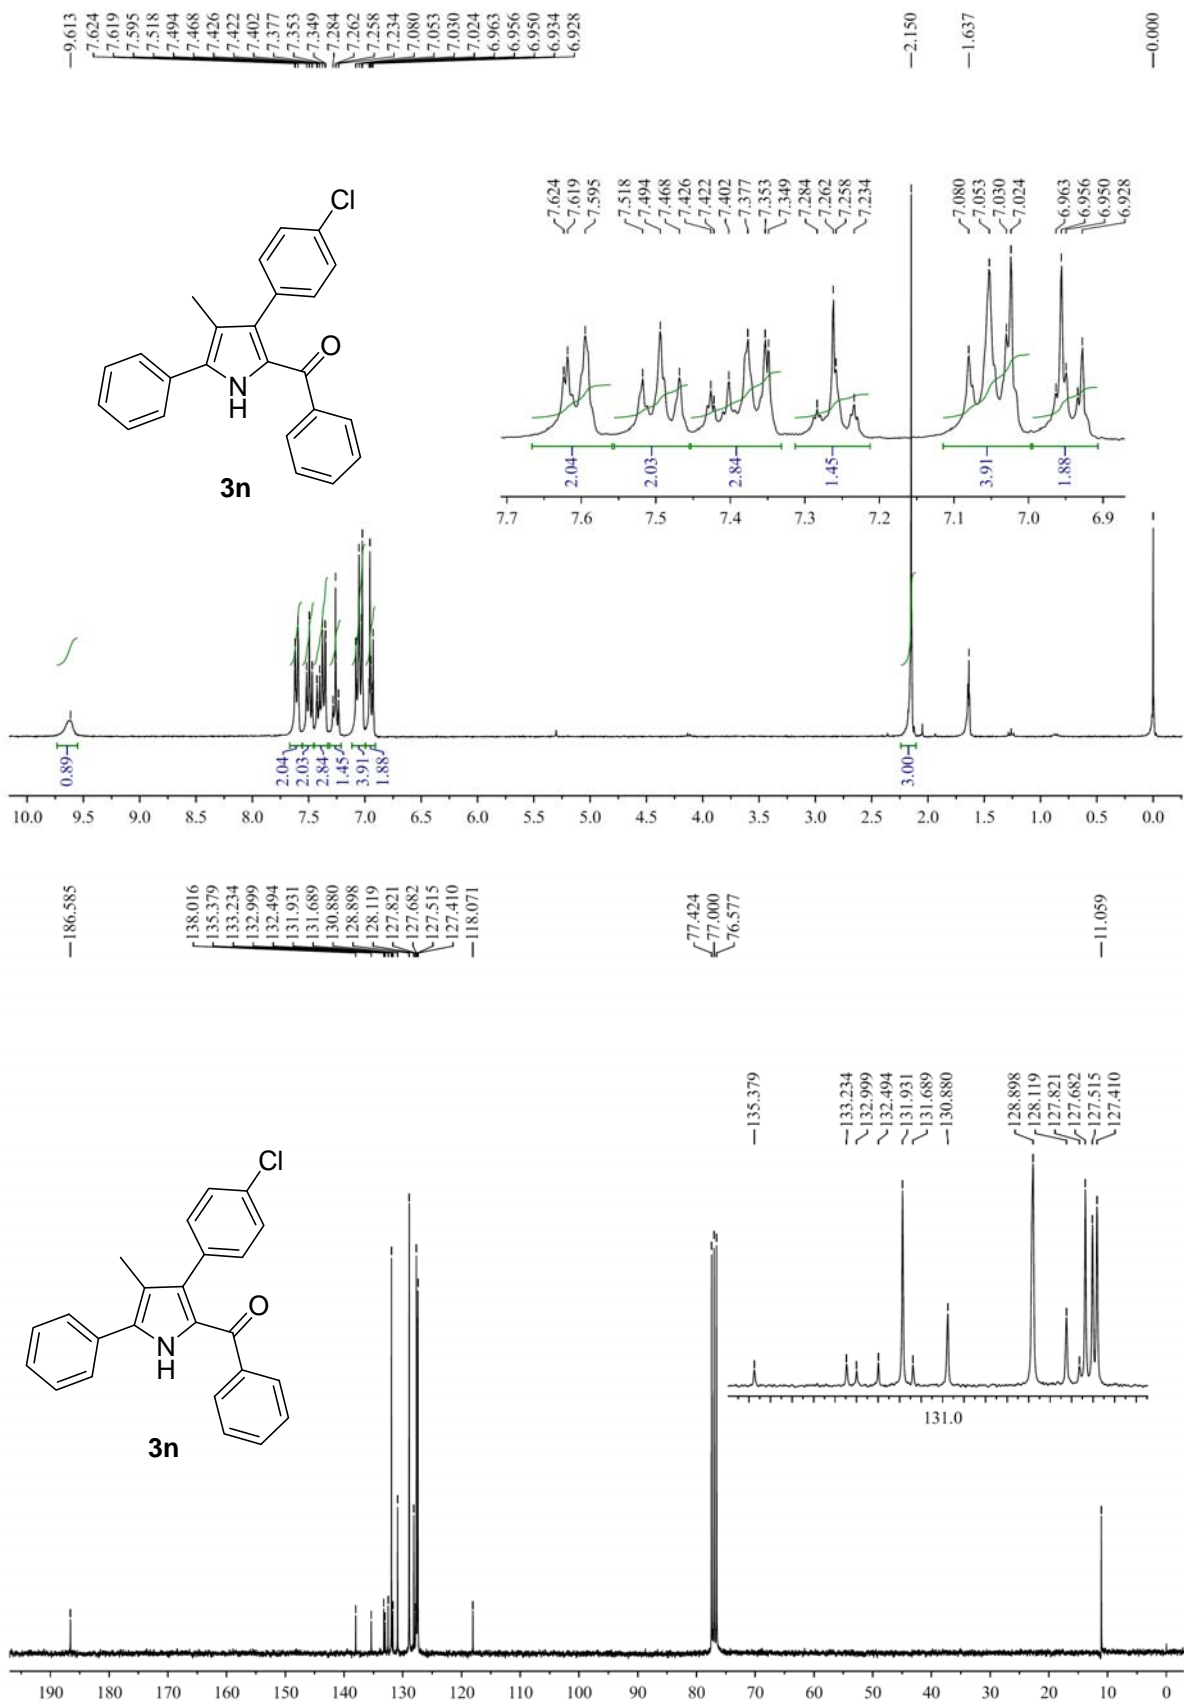

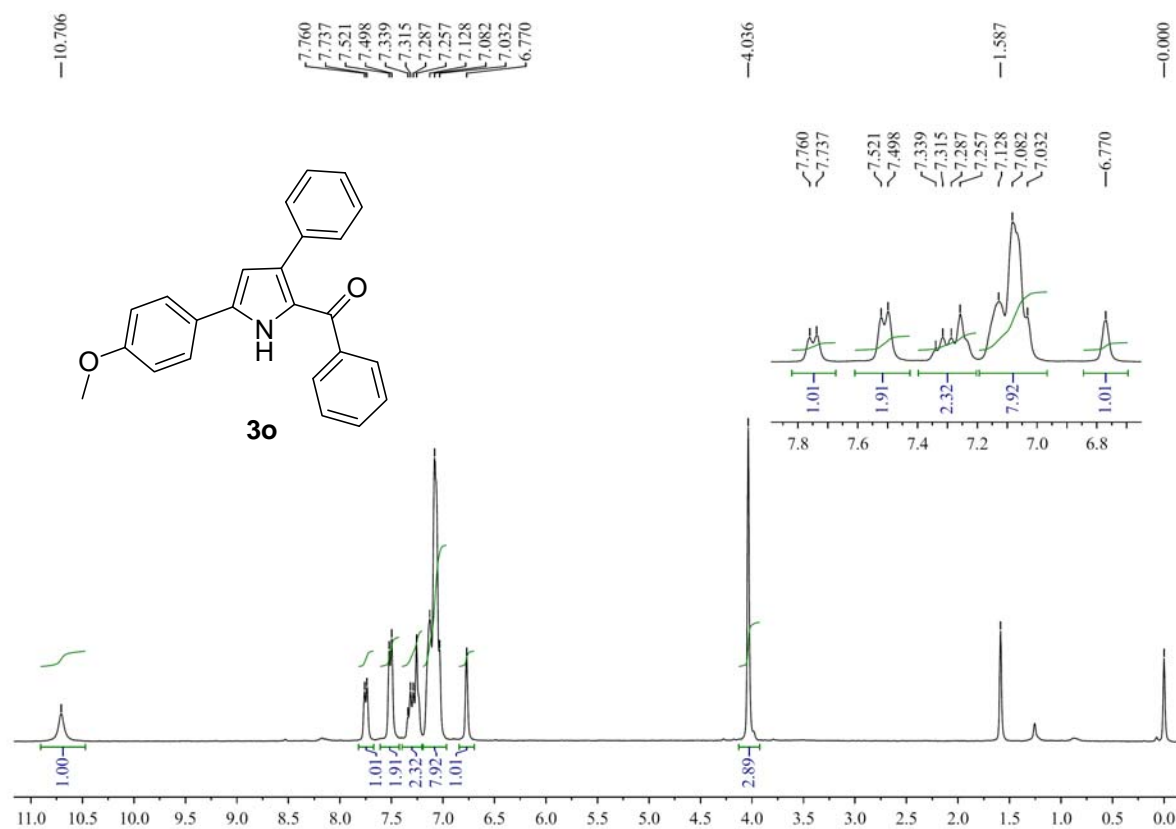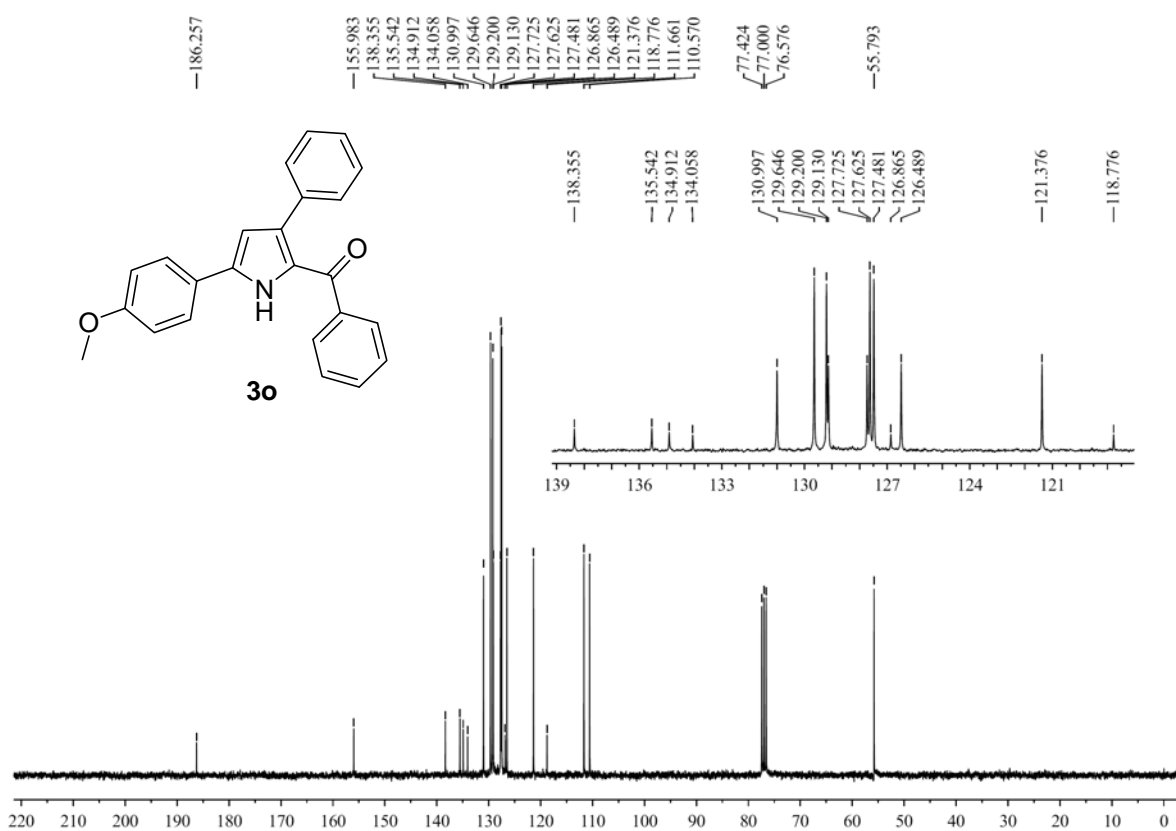



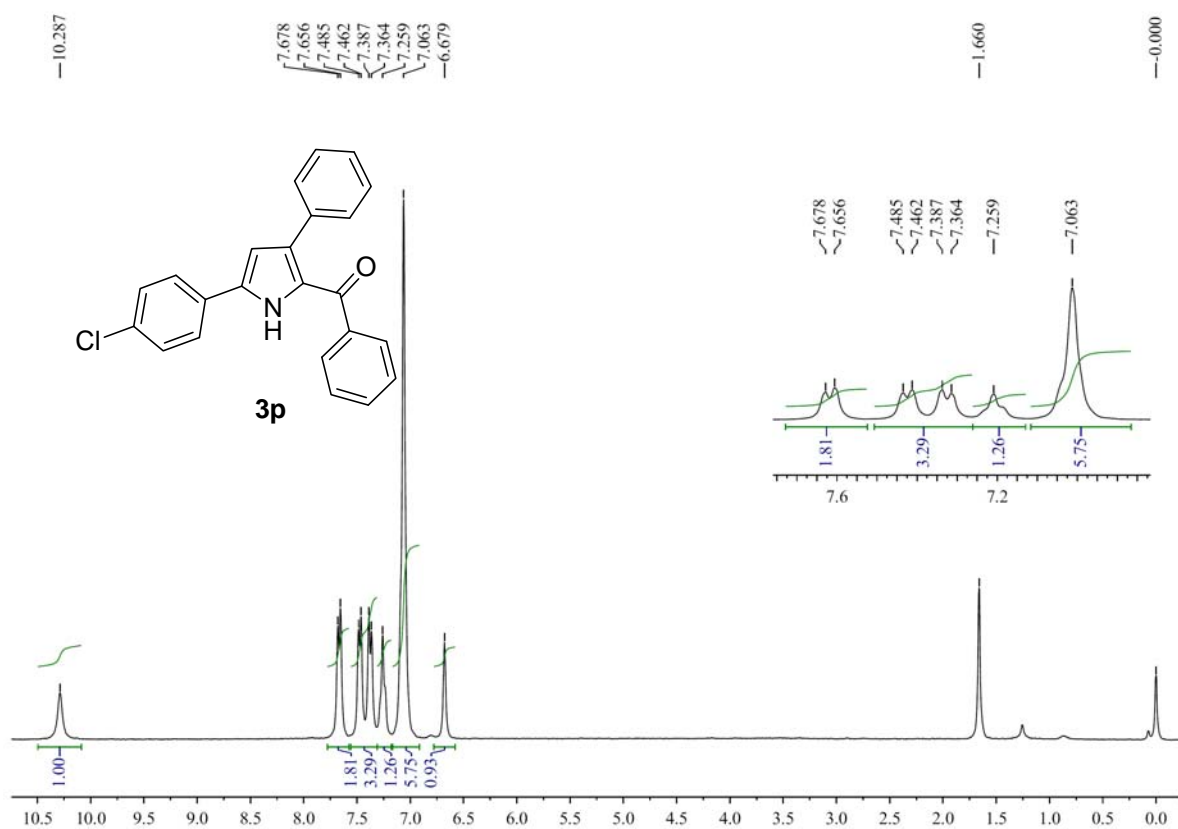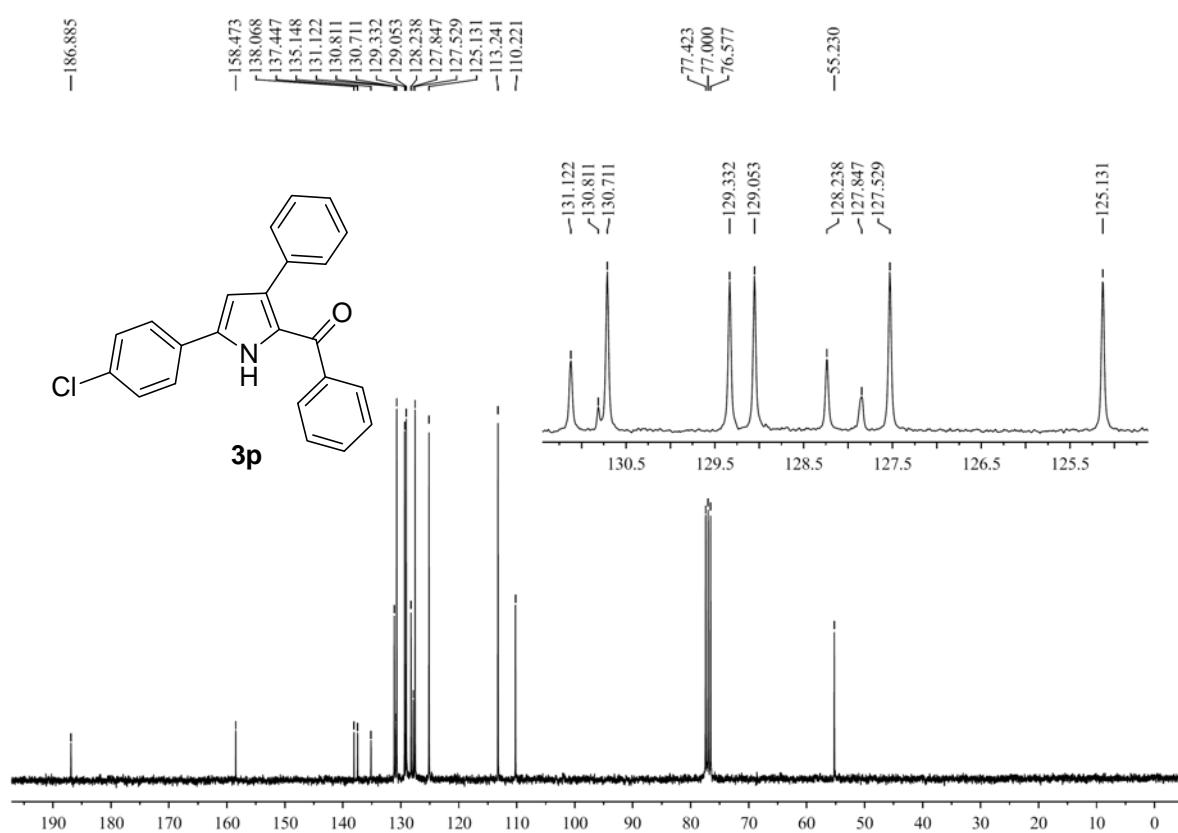

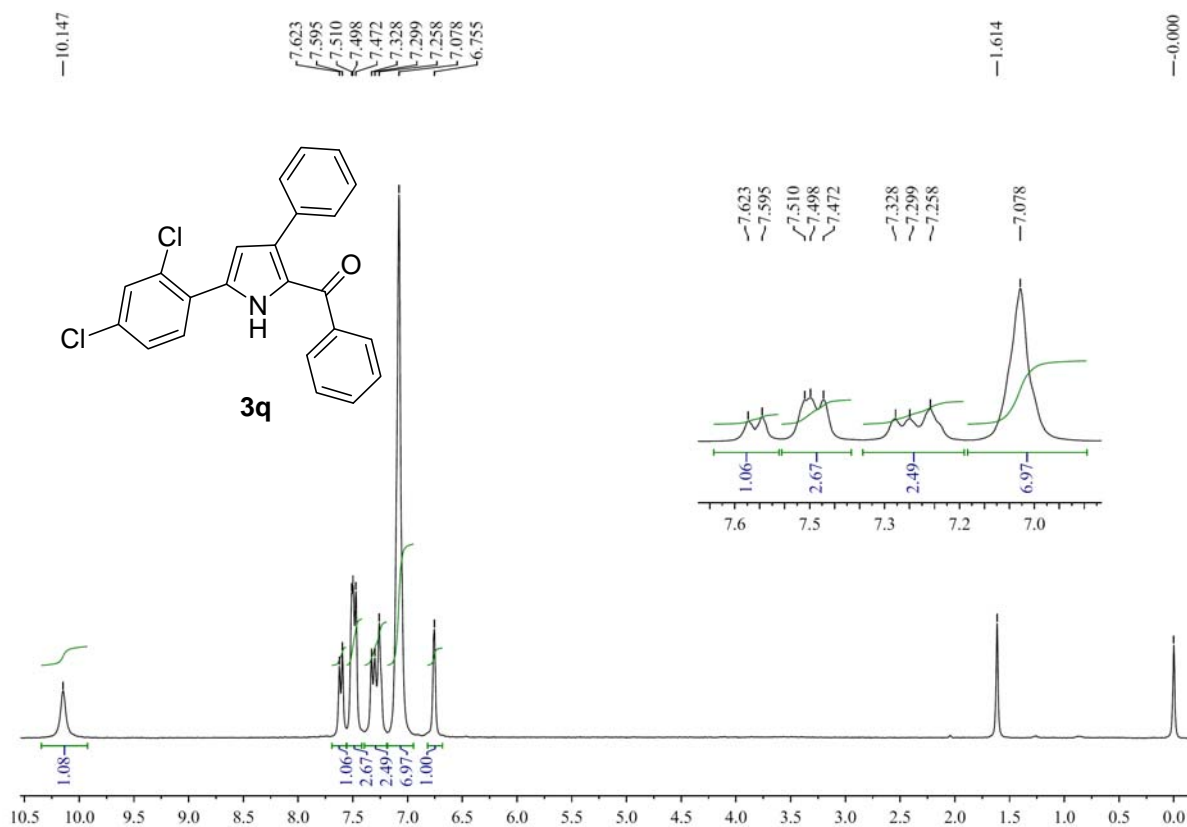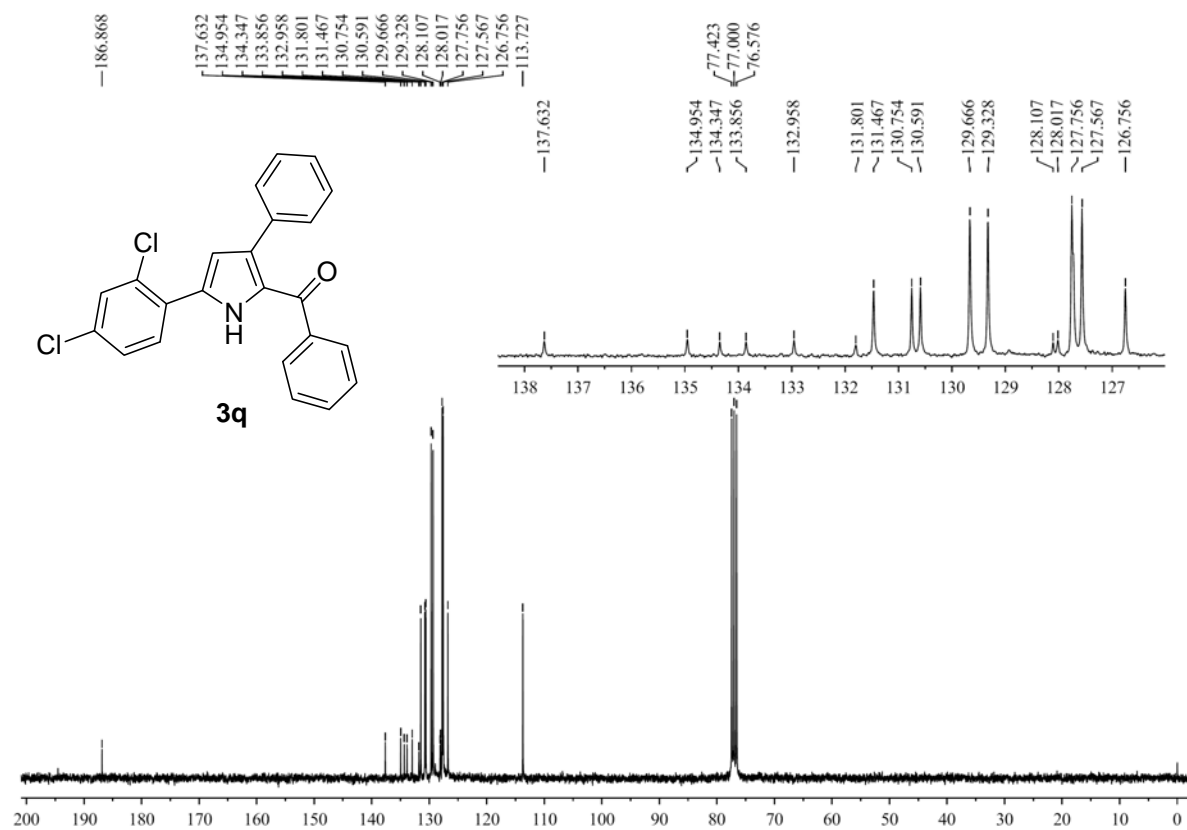

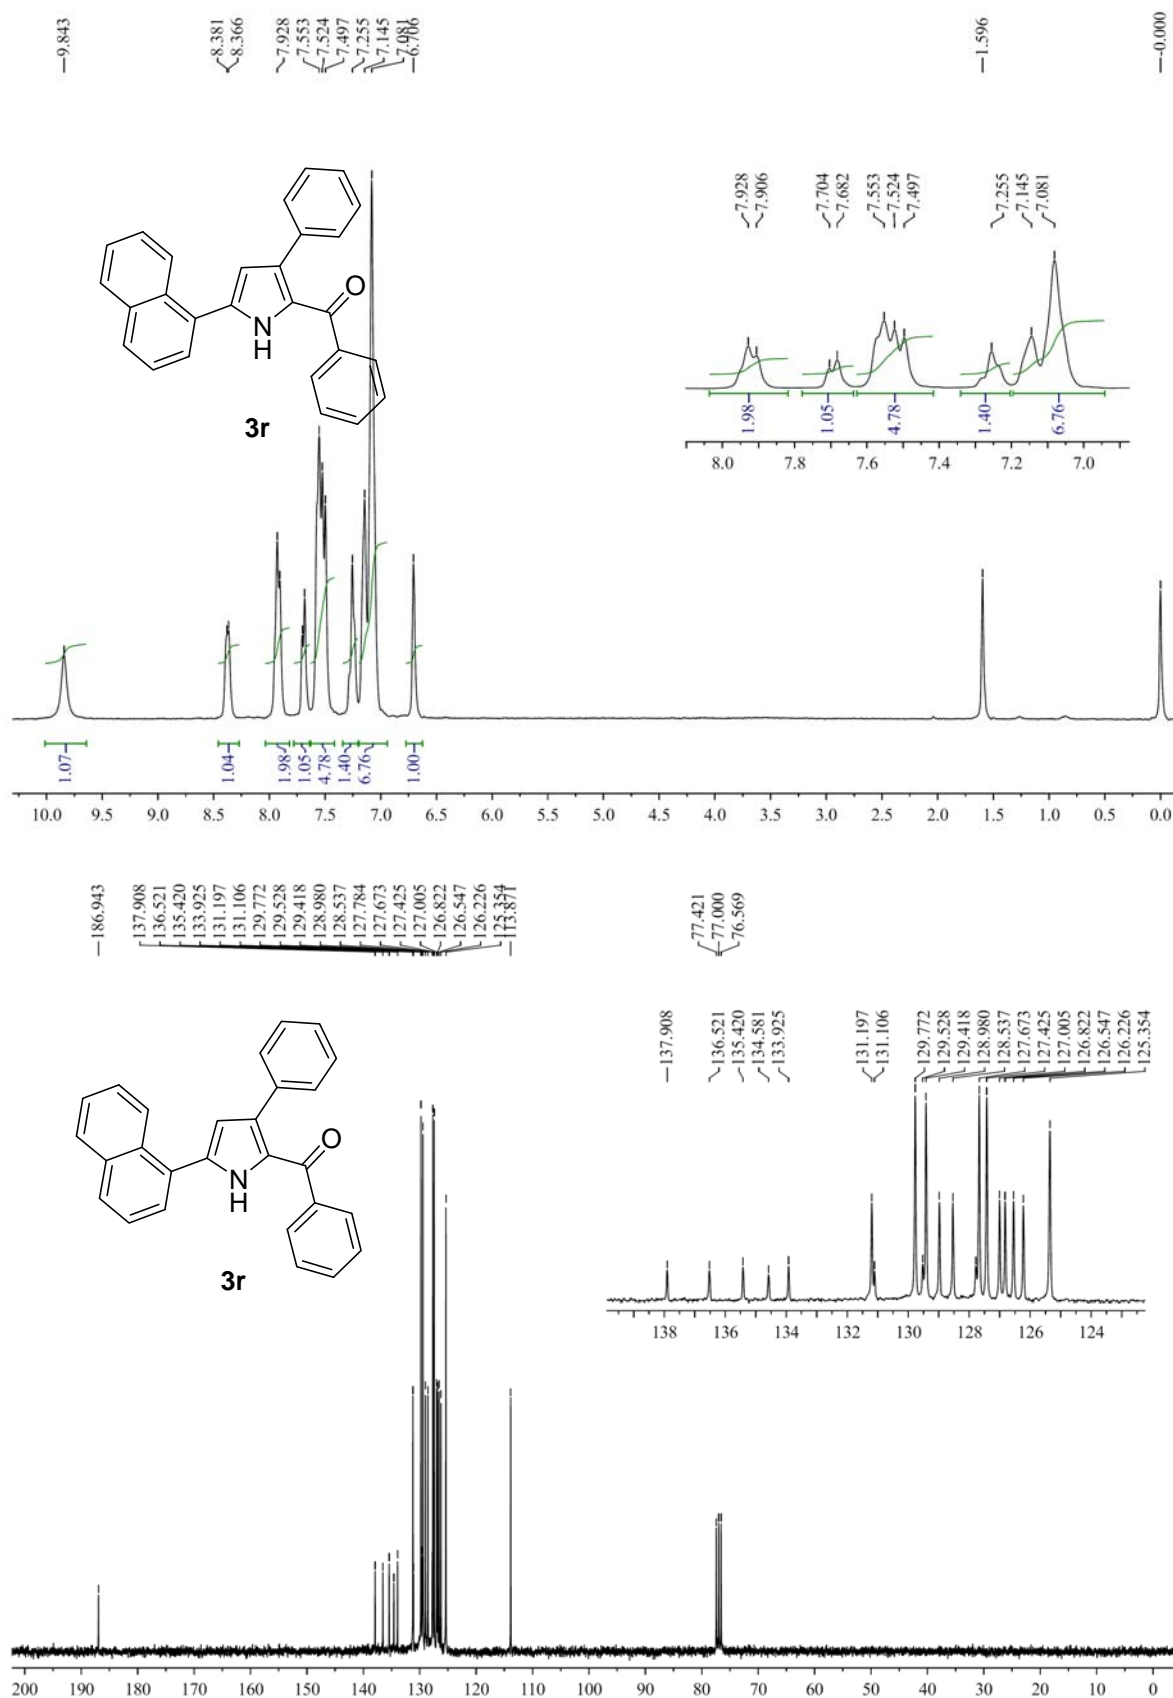

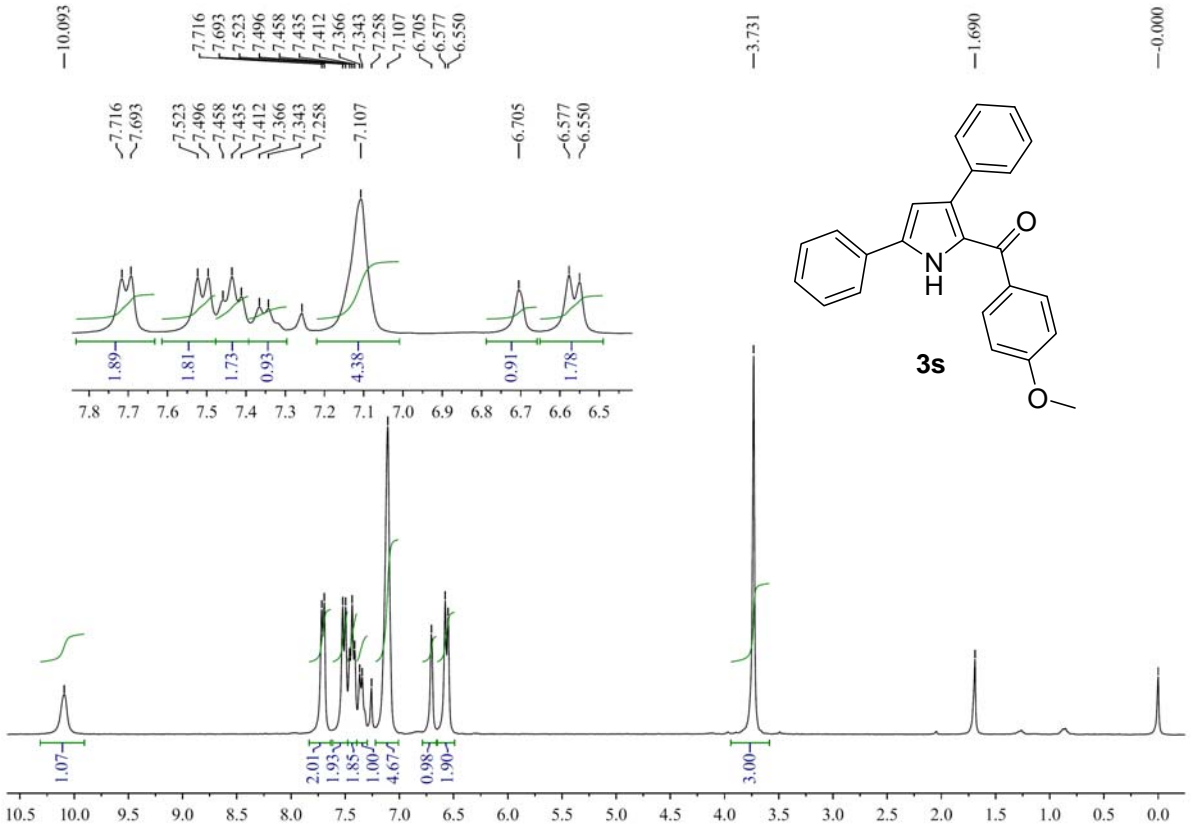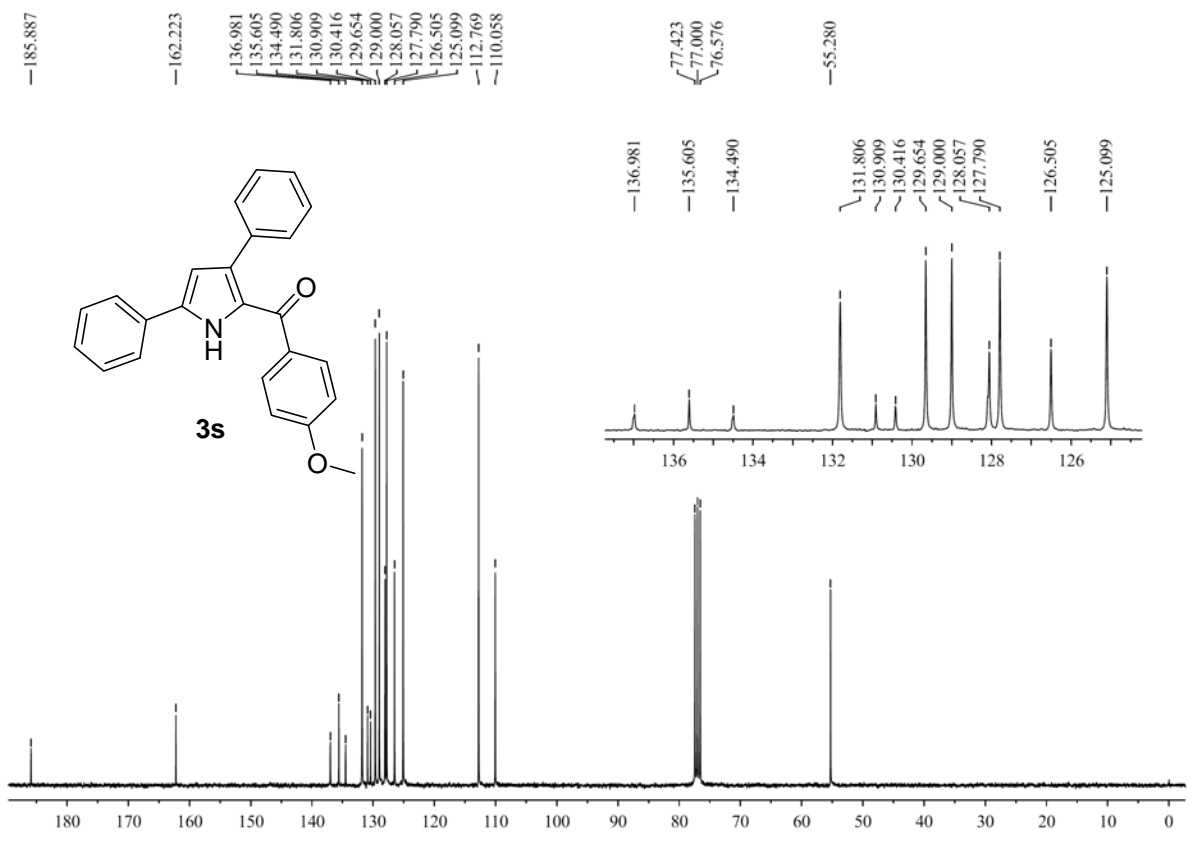

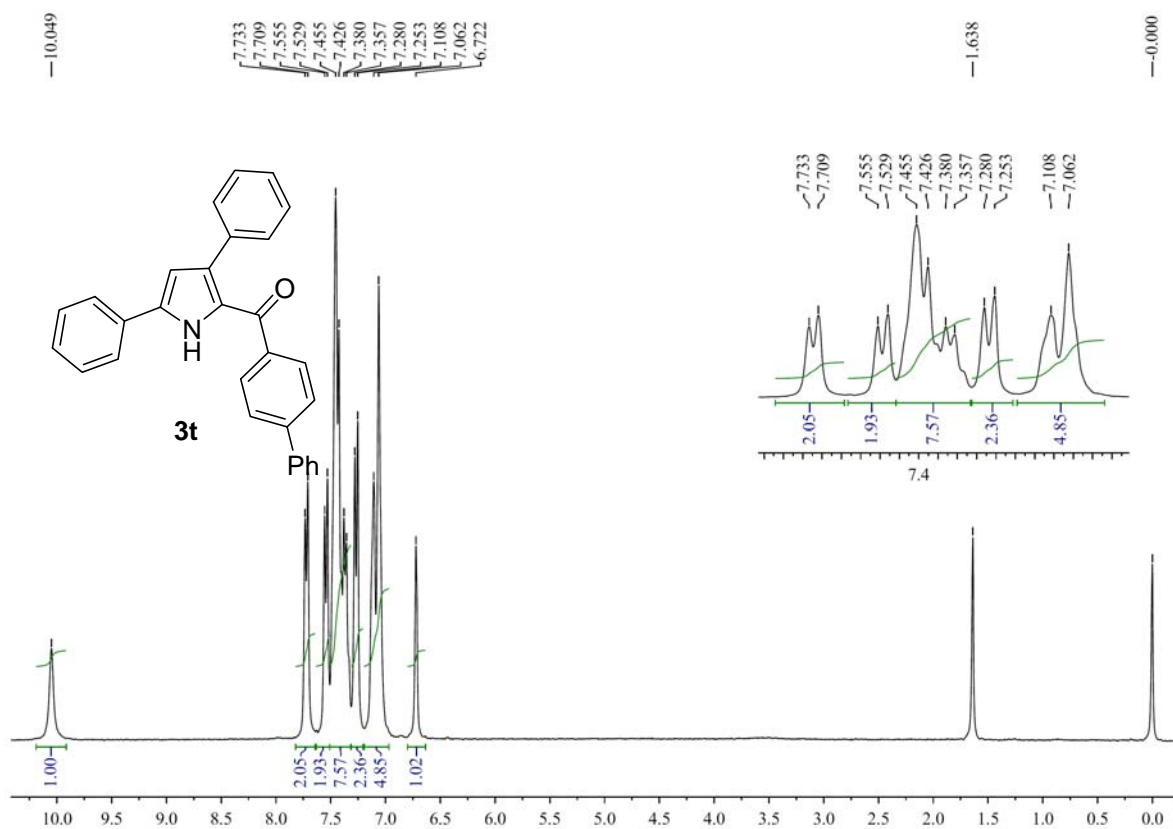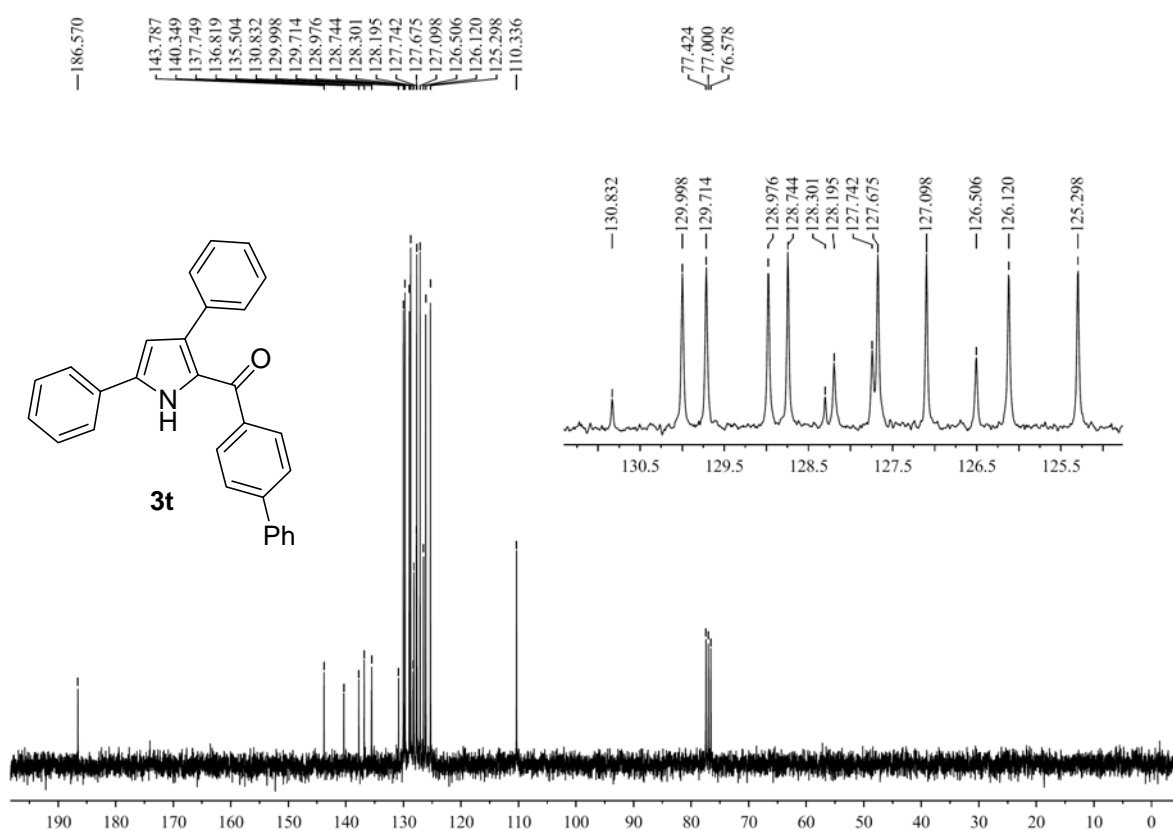

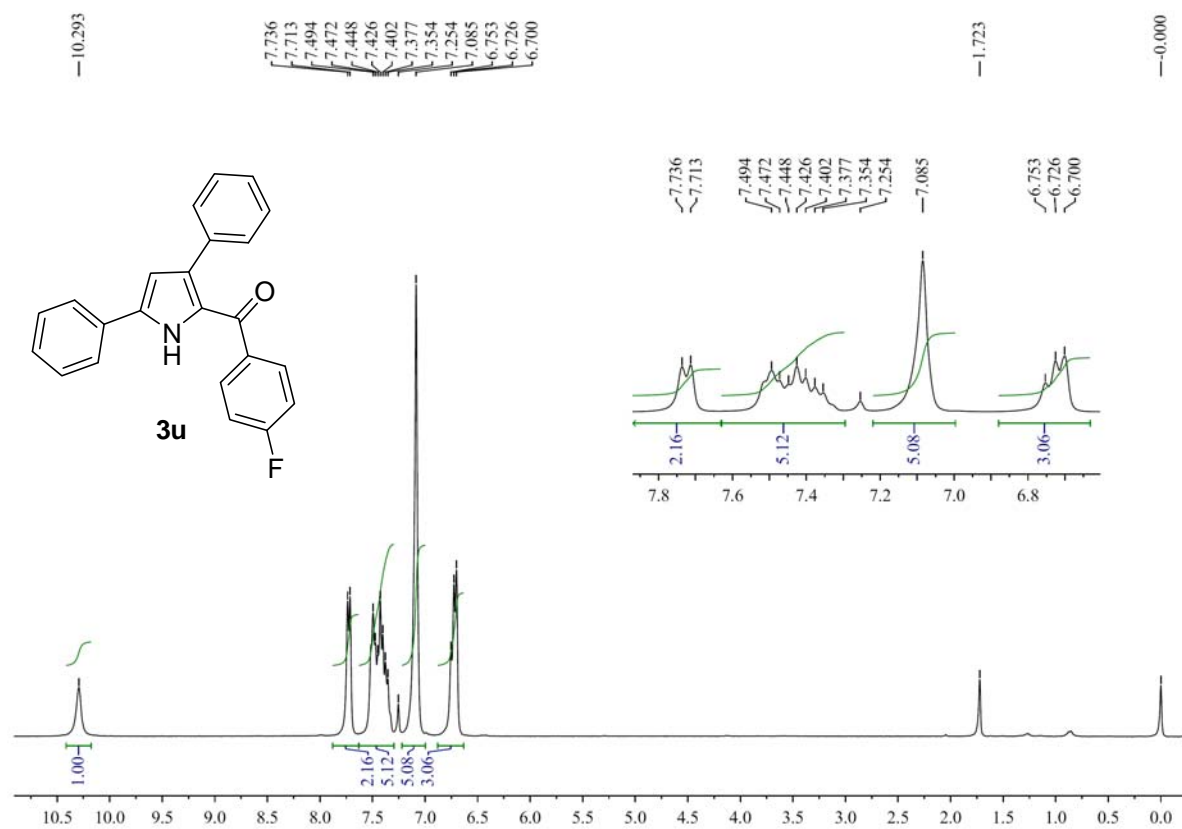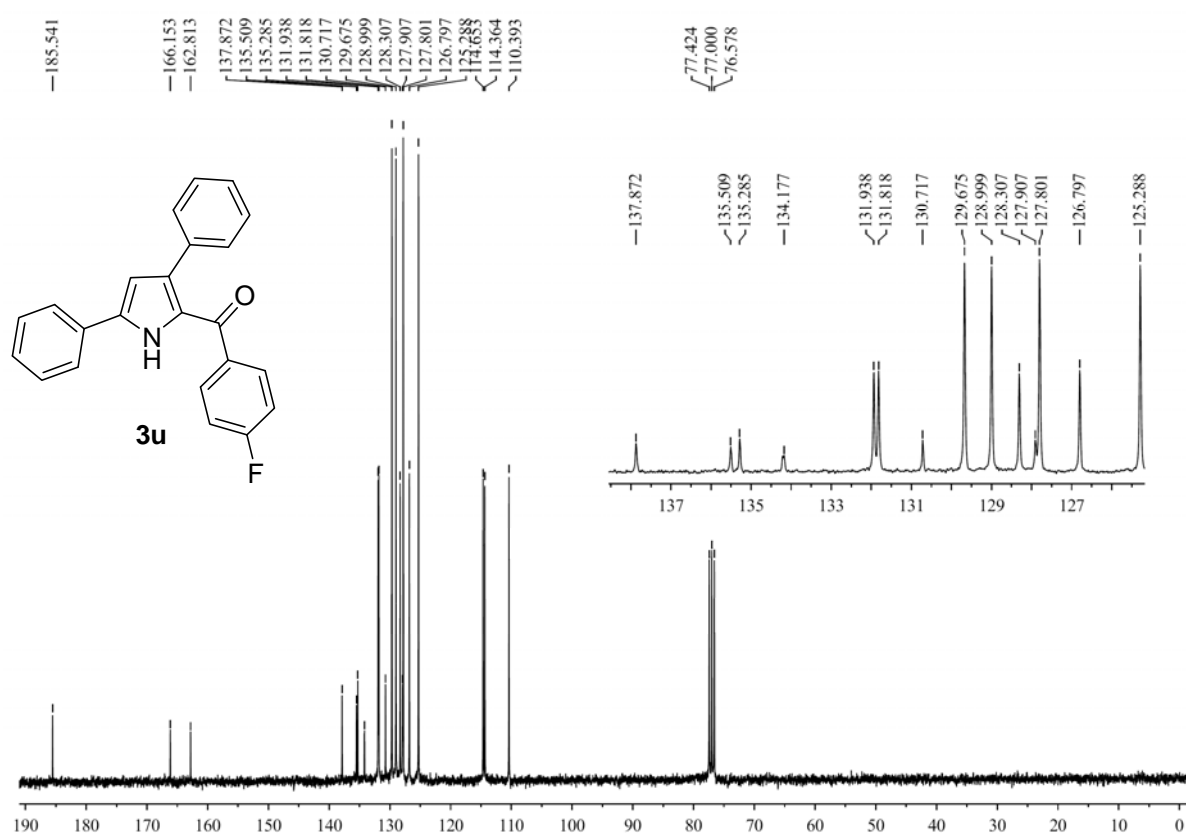

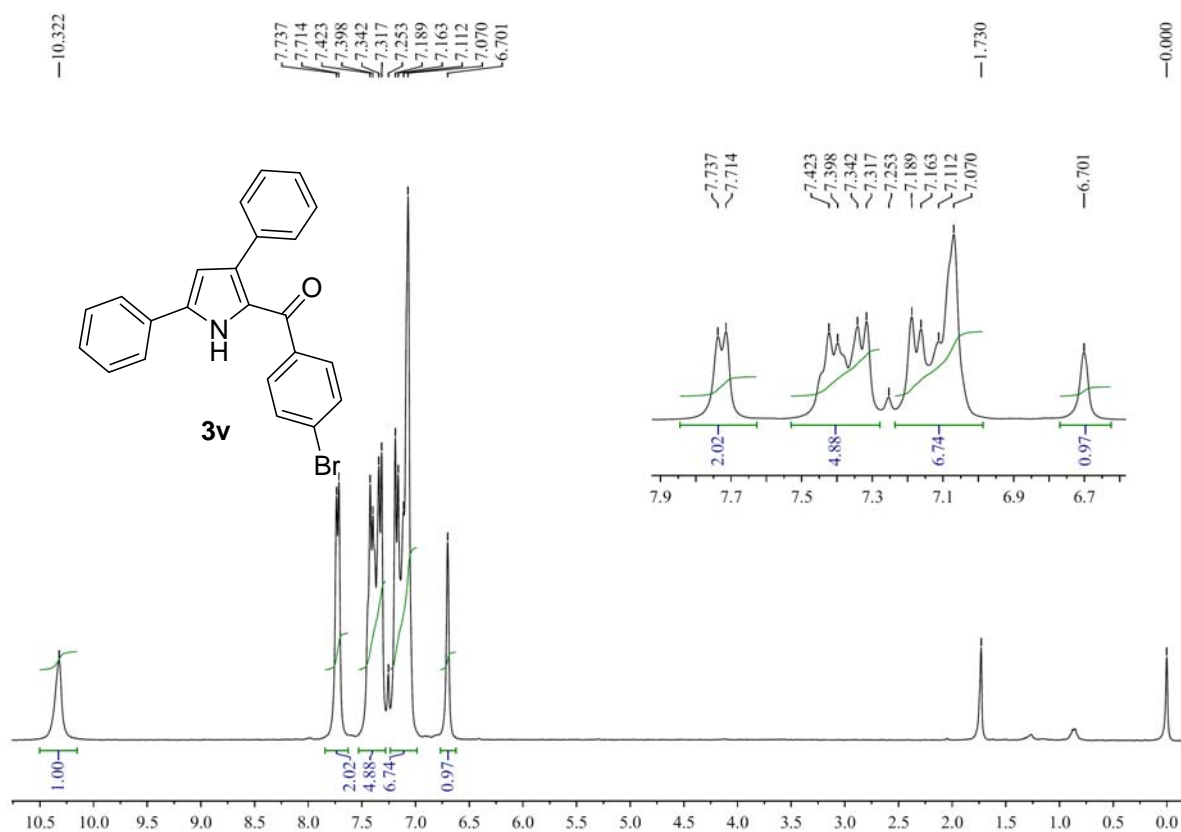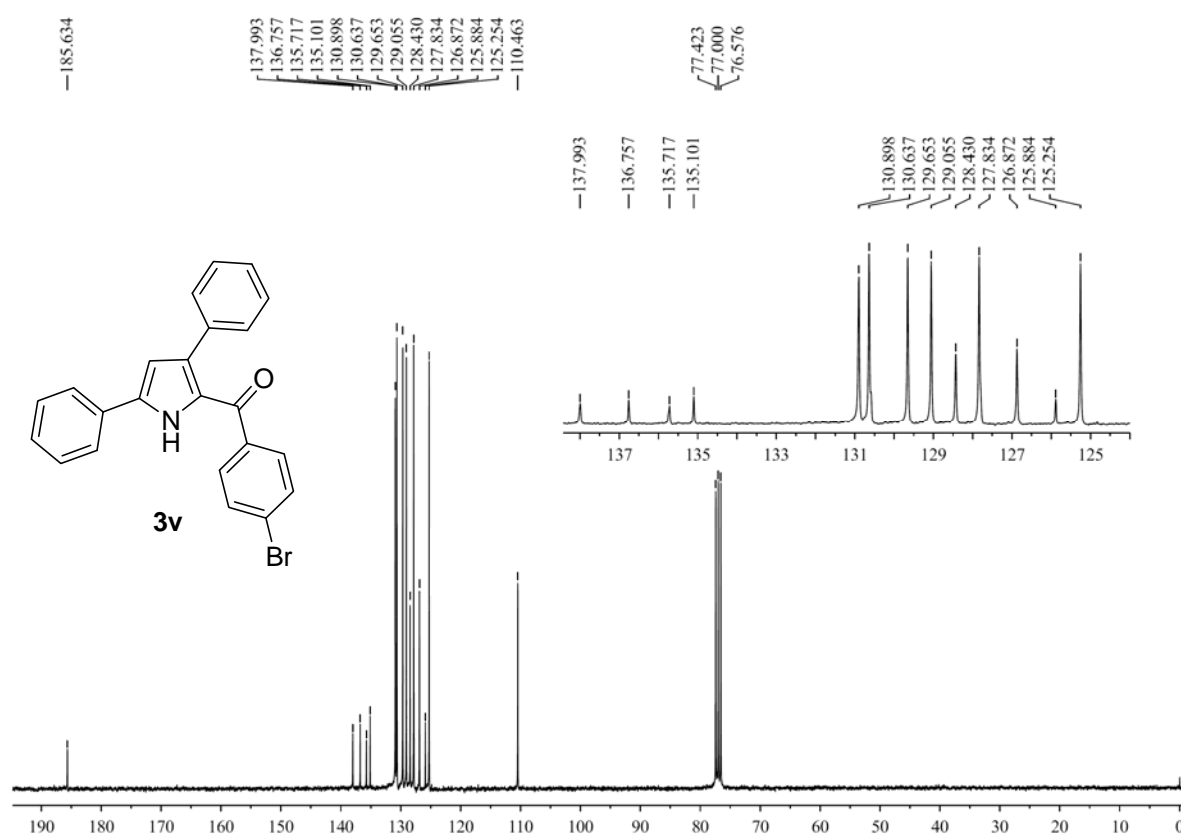

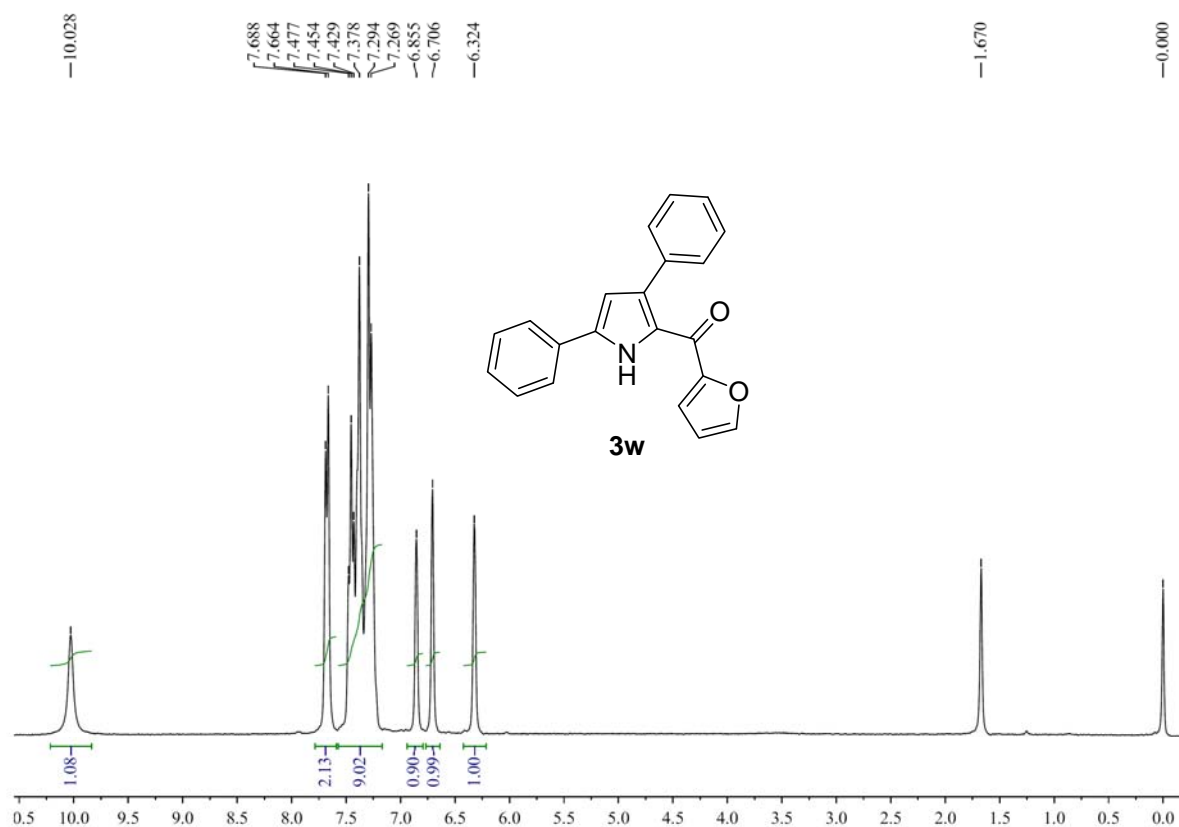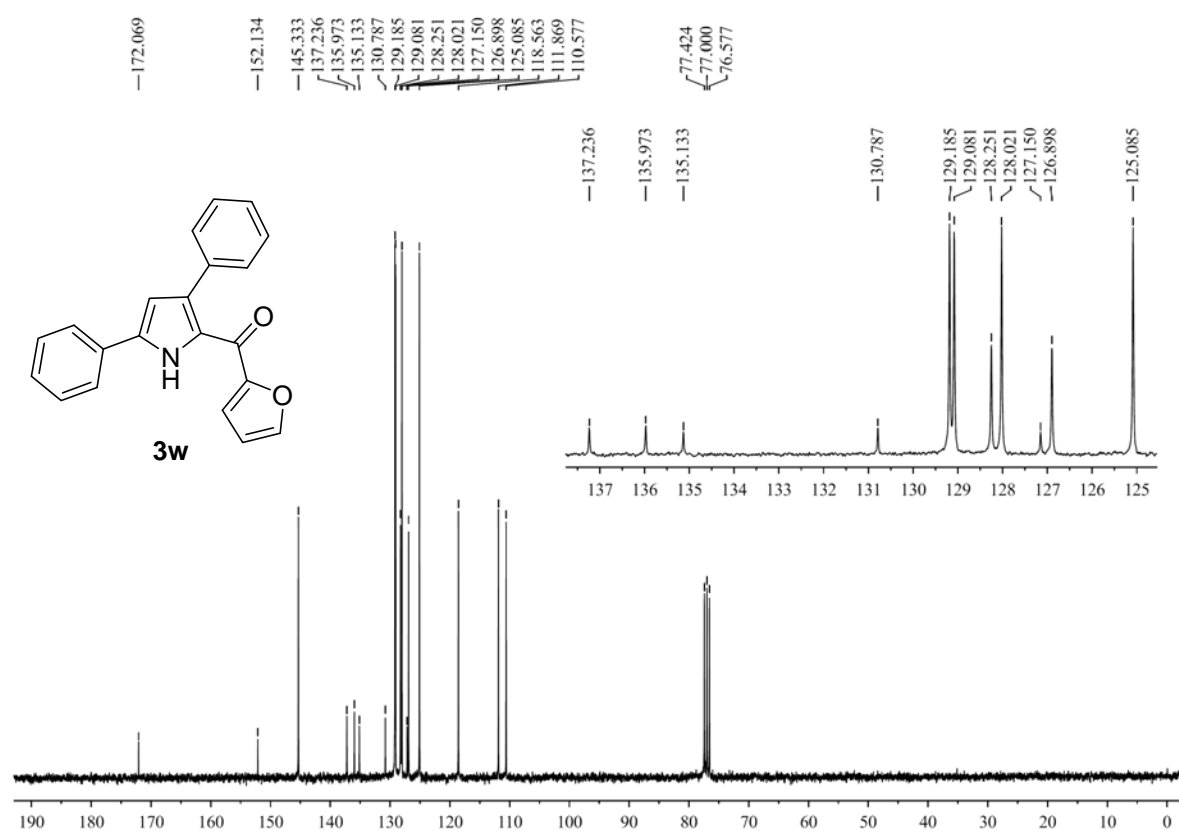

Supplement: c3ob42324g.pdf [file c3ob42324g.pdf]
